# Supplementary material for: Arginine thioacid in synthesis of arginine conjugates and peptides
Source: Royal Society of Chemistry journal article supplement (doi:10.1039/c4ra04897k), 2014-10-09

## Supporting Information

### Arginine Thioacid in Synthesis of Arginine Conjugates and Peptides

Ravil N. Khaybullin,<sup>\*a</sup> Siva S. Panda,<sup>a</sup> Saeid Mirzai,<sup>a</sup> Ellen Toneff,<sup>a</sup> Abdullah M. Asiri,<sup>b,c</sup> C.

Dennis Hall<sup>\*a</sup> and Alan R. Katritzky<sup>a,b</sup>

<sup>a</sup>Center for Heterocyclic Compounds, Department of Chemistry, University of Florida,  
Gainesville, FL 32611-7200, USA

<sup>b</sup>Center of Excellence for Advanced Material Research, King Abdulaziz University, Jeddah,  
21589, Saudi Arabia

<sup>c</sup>Department of Chemistry, King Abdulaziz University, Jeddah, 21589, Saudi Arabia

E-mail: [ravilx84@gmail.com](mailto:ravilx84@gmail.com), [charlesdennishall@gmail.com](mailto:charlesdennishall@gmail.com)

#### Contents

- |                                                                                         |         |
|-----------------------------------------------------------------------------------------|---------|
| 1. Copies of <sup>1</sup> H NMR, <sup>13</sup> C NMR, CHN and HRMS of all the compounds | S2–S38  |
| 2. HPLC spectra of compound <b>5a–c</b>                                                 | S39–S41 |

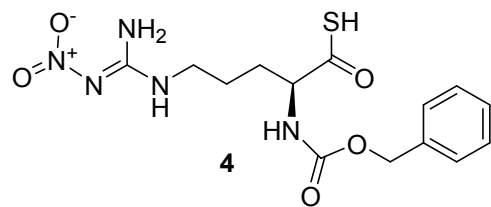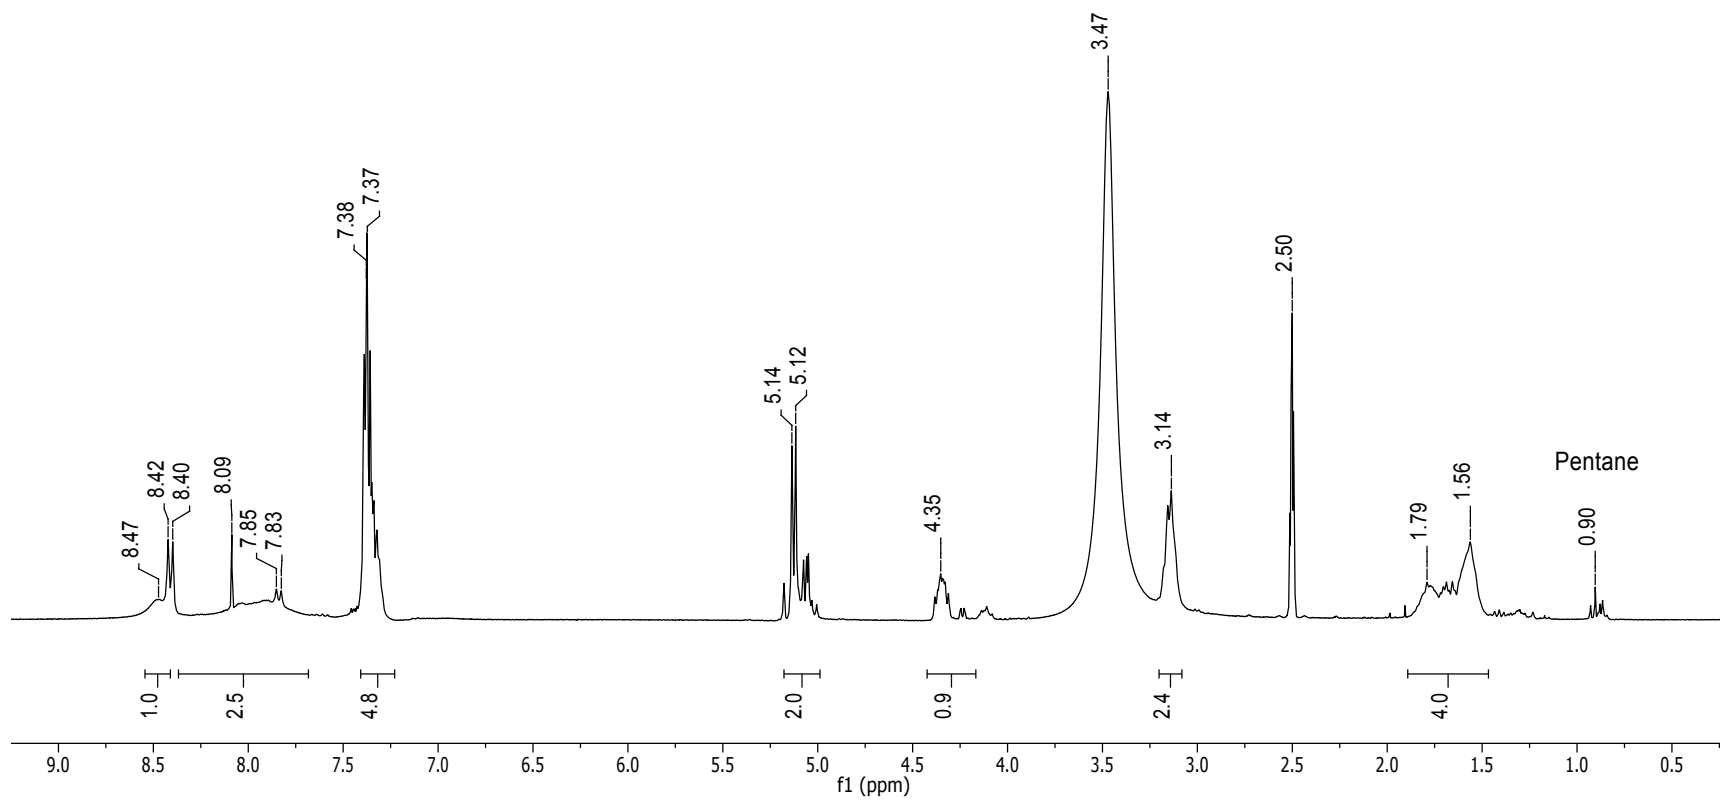

CbzNO2ArgSH\_23June2013\_13C\_DMSO\_repeat24June\_Ravil

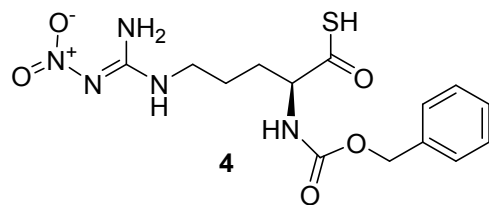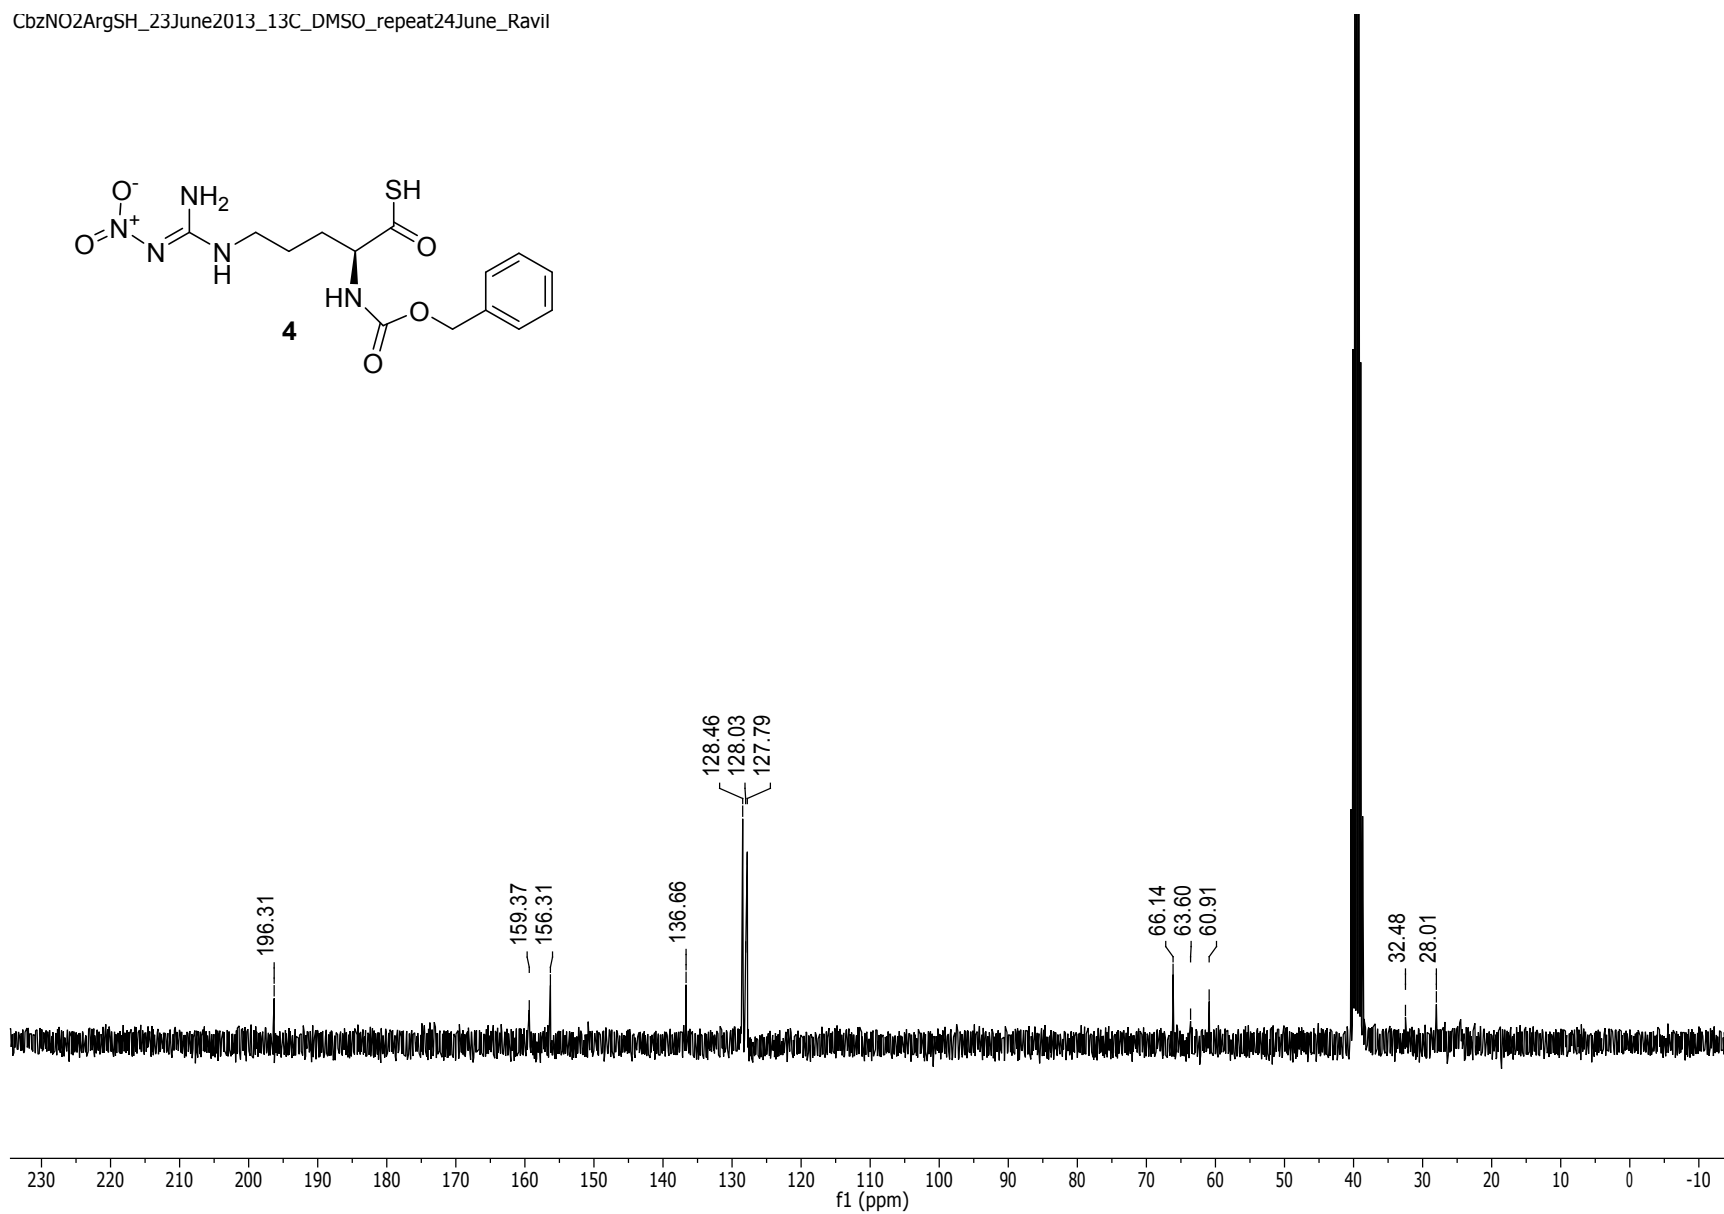

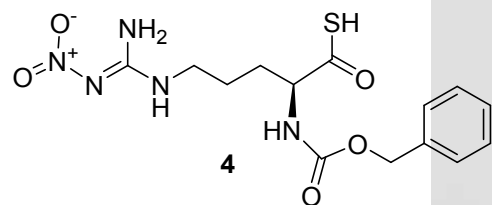

### EAGER 200 Stripchart

Sample Ident. : 25 2195\_ZNO2ArgSH    Filename : 279325  
 Analysed : 06-20-13 10:58:02    Printed : 06-20-2013 13:19:47

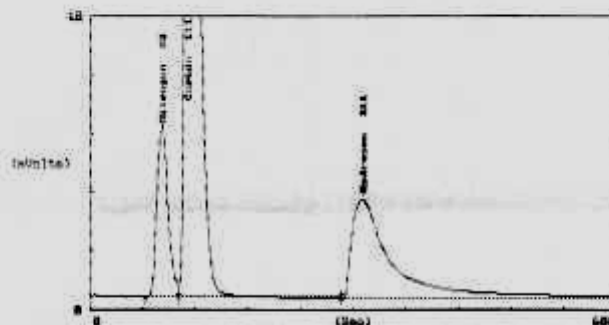

### EAGER 200 Peak Integration Report

Instrument name : Instrument #1    Bline drift (fV): 2  
 Company Name : U of Florida    Operator Ident. : KOU  
 Analysed : 06-20-13 10:58:02    Printed : 06-20-2013 13:19:48  
 Sample Ident. : 25 2195\_ZNO2ArgSH    Filename : 279325  
 Sample Weight : 2.139    Calc.method: using 'K. Factors'

| No. (#) | Type (#) | Start (Sec) | End (Sec) | Ret. Time (Sec) | Height (fV) | Area (fV*Sec) | Area % (%) | Name     |
|---------|----------|-------------|-----------|-----------------|-------------|---------------|------------|----------|
| 1       | FU       | 63          | 101       | 82              | 5660.0      | 79290         | 9.74       | Nitrogen |
| 2       | FU       | 101         | 267       | 111             | 37507.7     | 563500        | 69.23      | Carbon   |
| 3       | RS       | 267         | 598       | 311             | 3327.9      | 171163        | 21.03      | Hydrogen |
| 813953  |          |             |           |                 |             |               | 100.00     |          |

### EAGER 200 Unk Report

Instrument name : Instrument #1    Bline drift (fV): 2  
 Company Name : U of Florida    Operator Ident. : KOU  
 Analysed : 06-20-13 10:58:02    Printed : 06-20-2013 13:19:48  
 Sample Ident. : 25 2195\_ZNO2ArgSH    Filename : 279325  
 Sample Weight : 2.139    Calc.method: using 'K. Factors'

| PK. (#) | Ret Time (Sec) | Area (fV*Sec) | Element % (%) | Area Ratio  | Name     |
|---------|----------------|---------------|---------------|-------------|----------|
| 1       | 82             | 79290         | 18.617        | .710680E+01 | Nitrogen |
| 2       | 111            | 563500        | 45.848        | .100000E+01 | Carbon   |
| 3       | 311            | 171163        | 5.147         | .329218E+01 | Hydrogen |

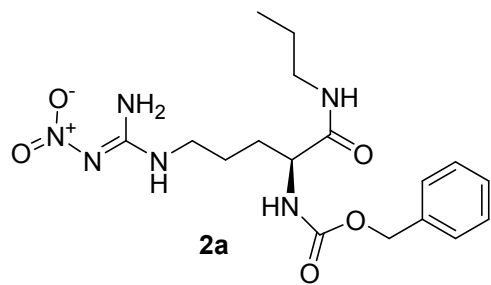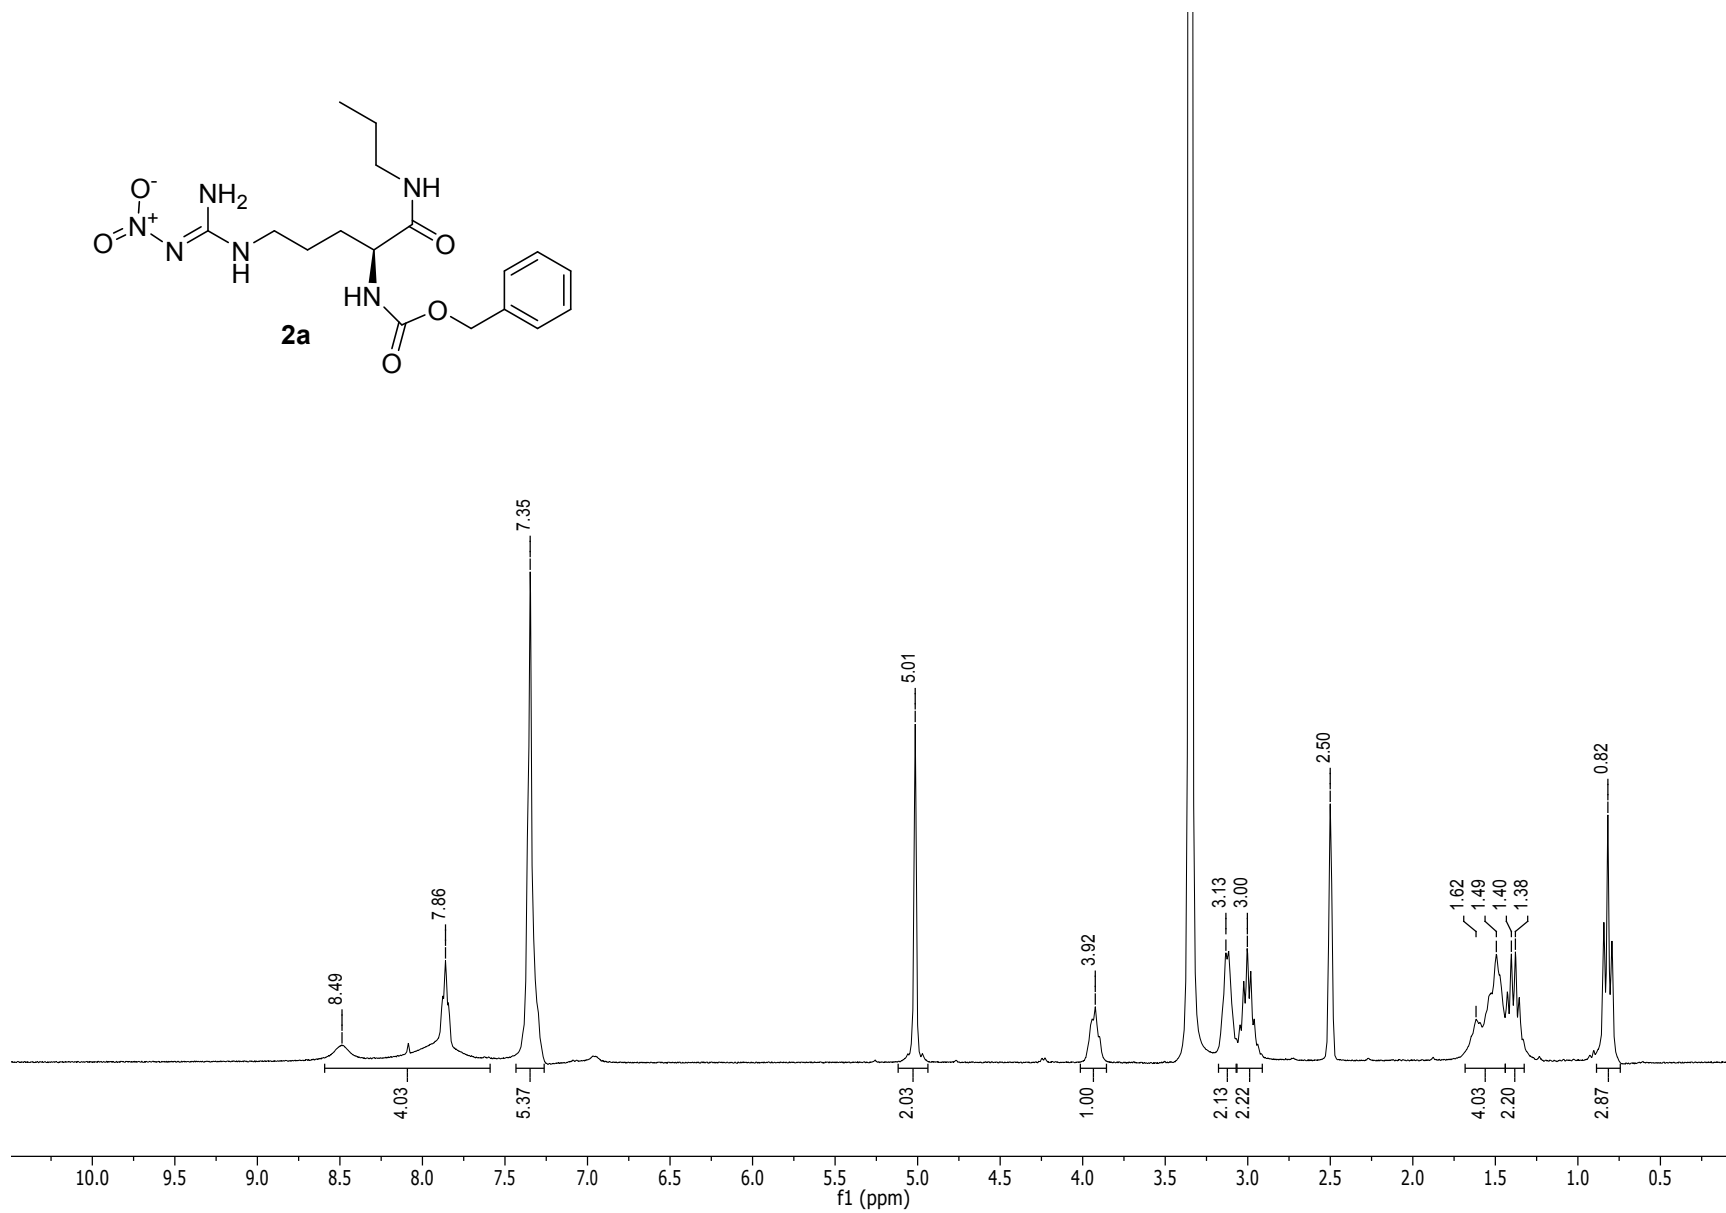

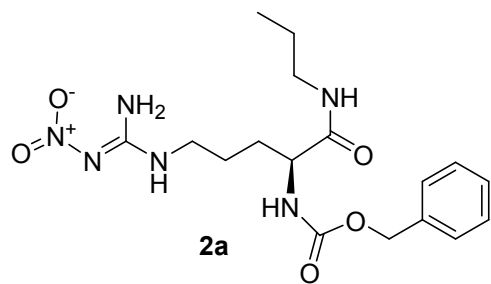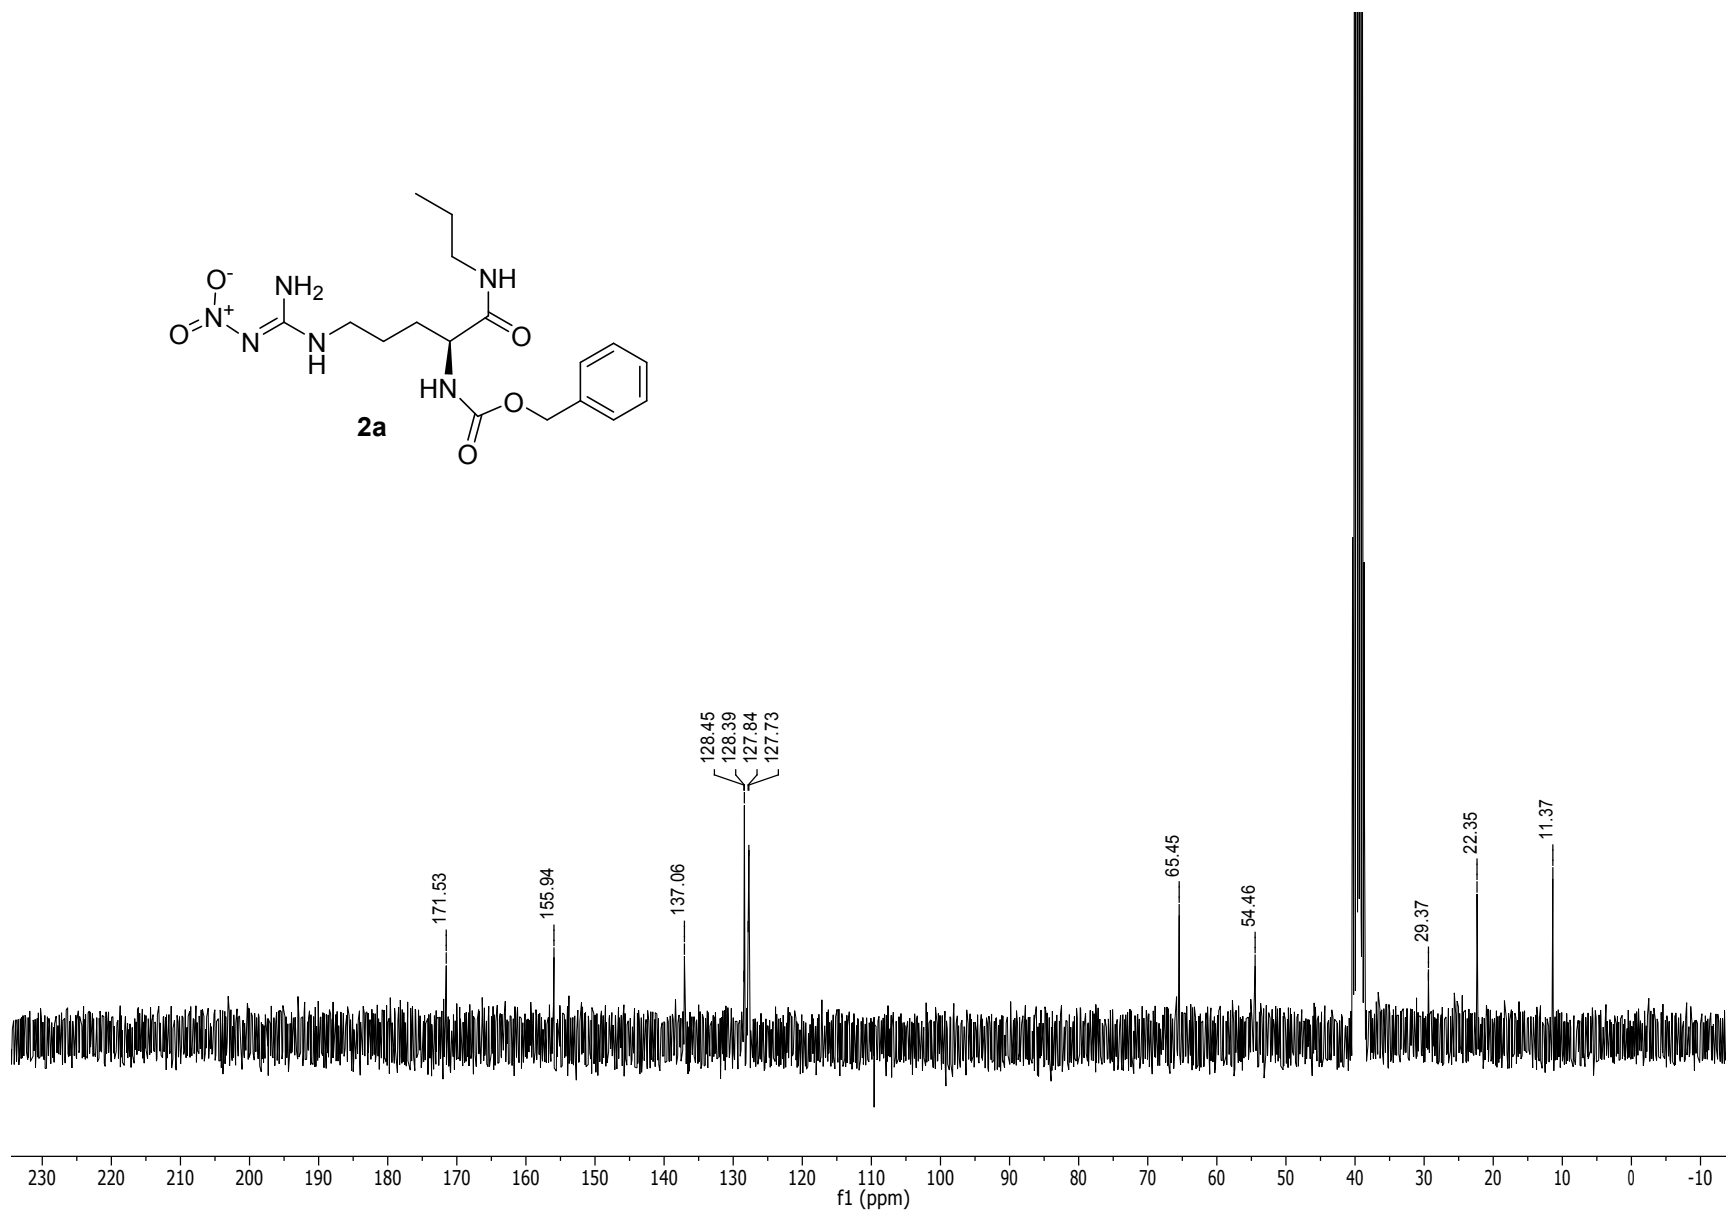

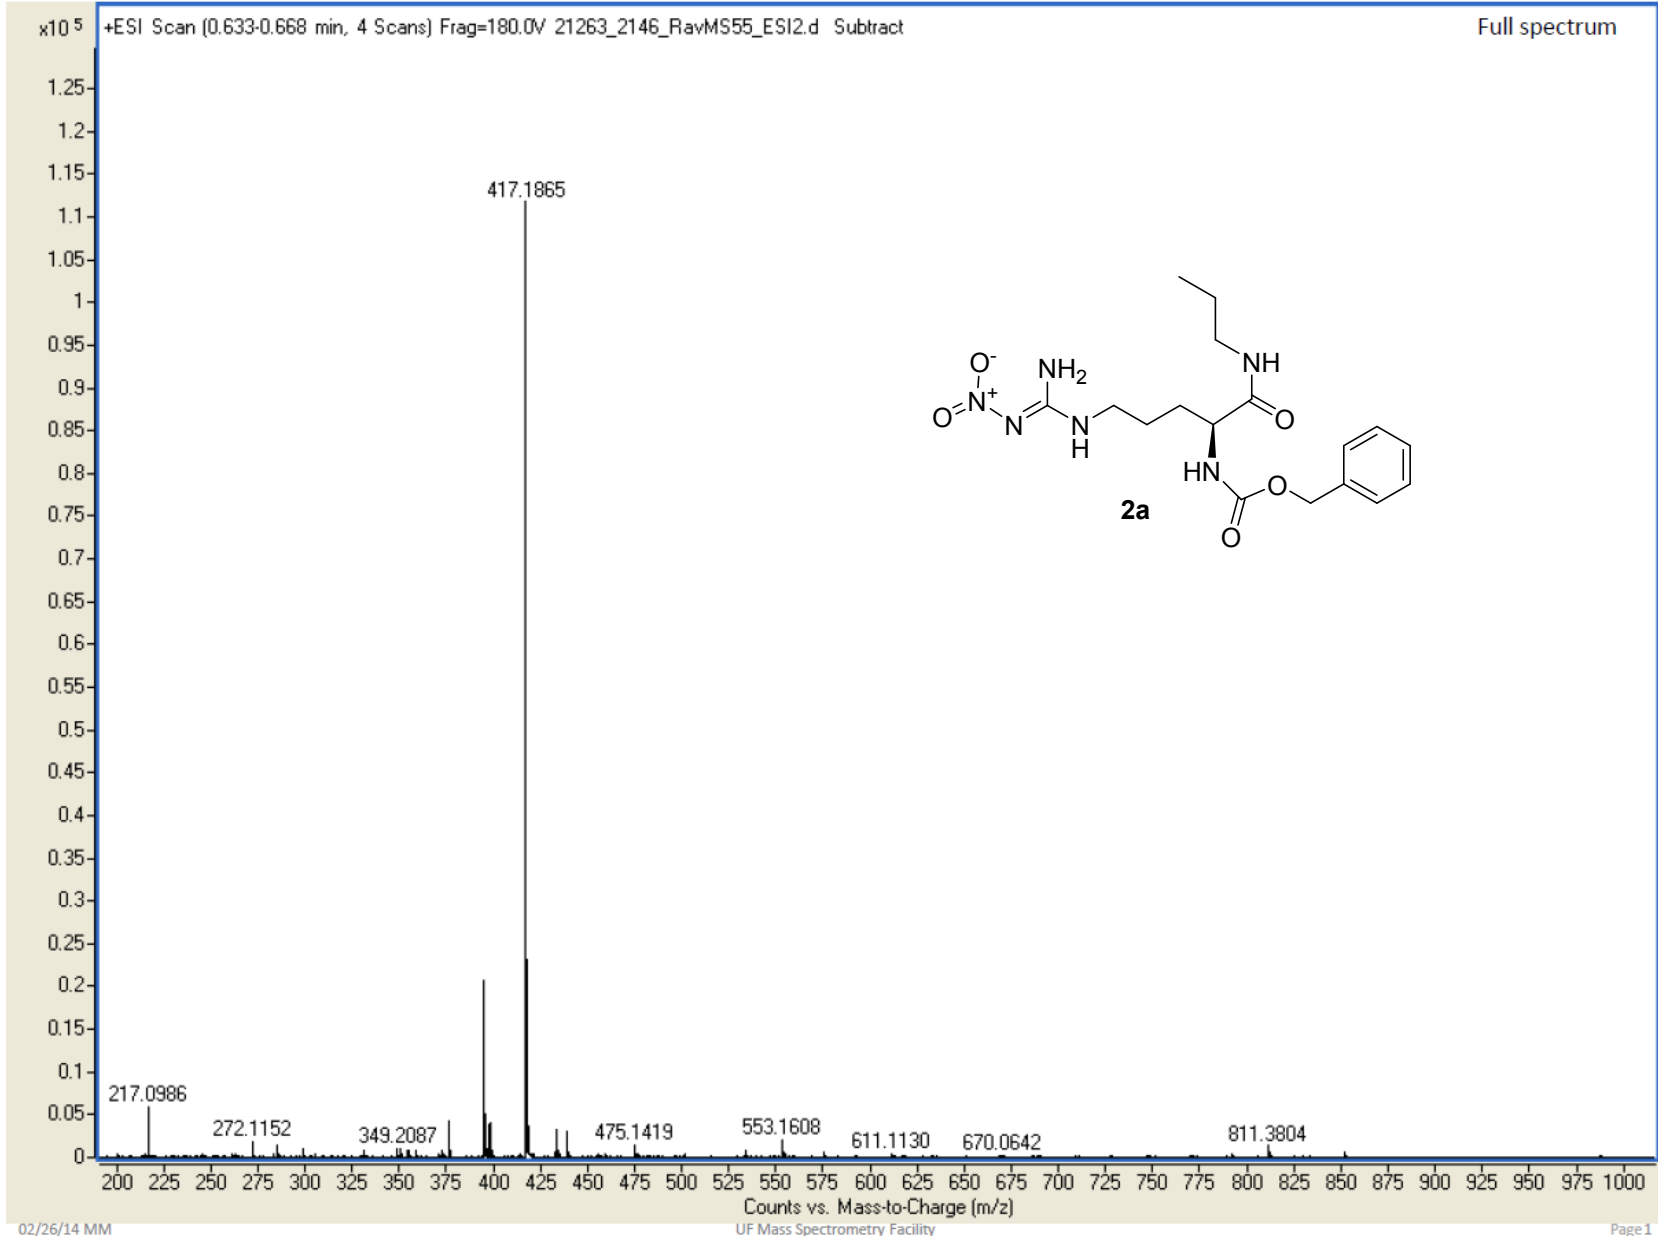

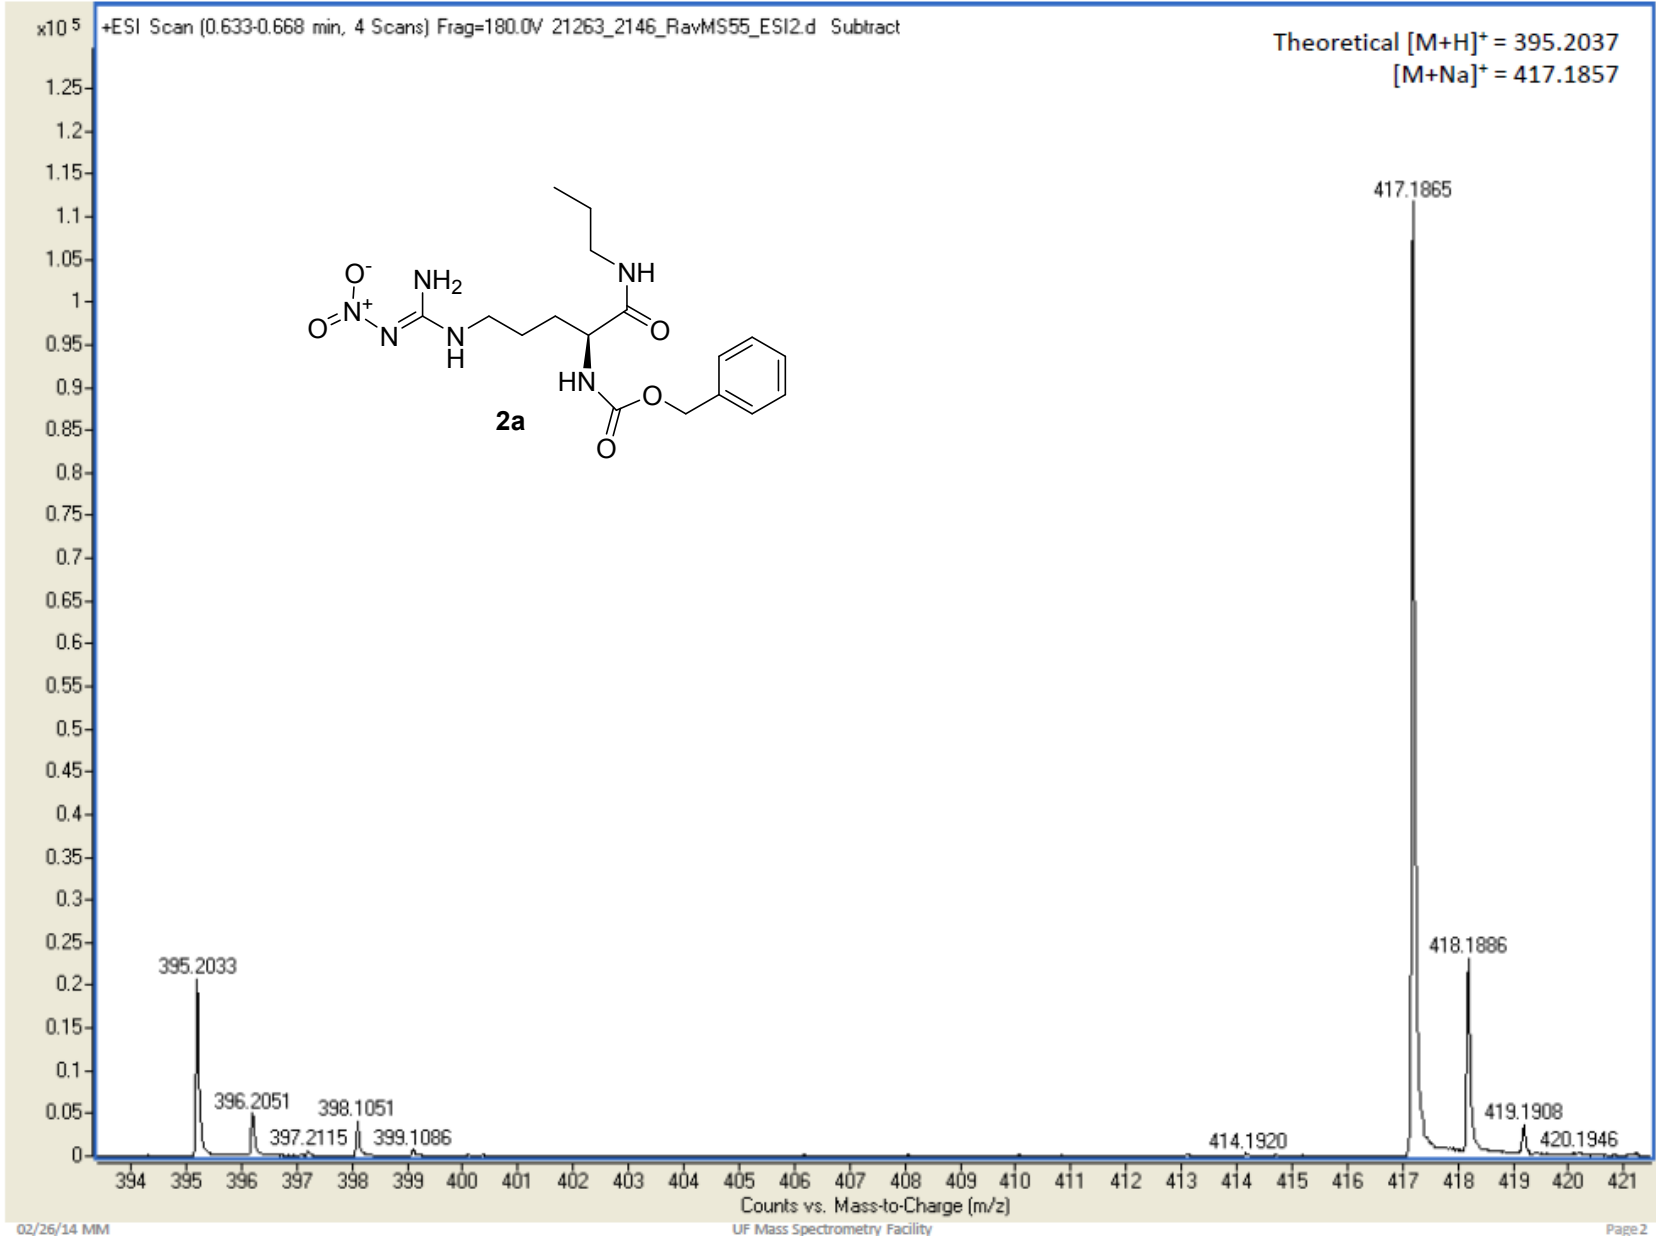



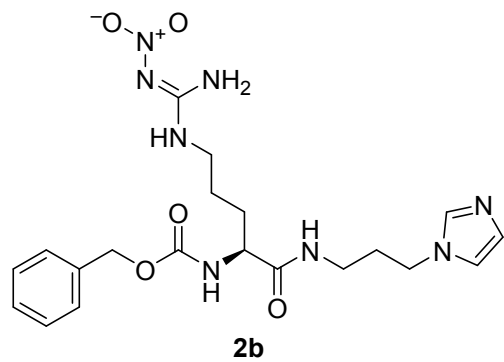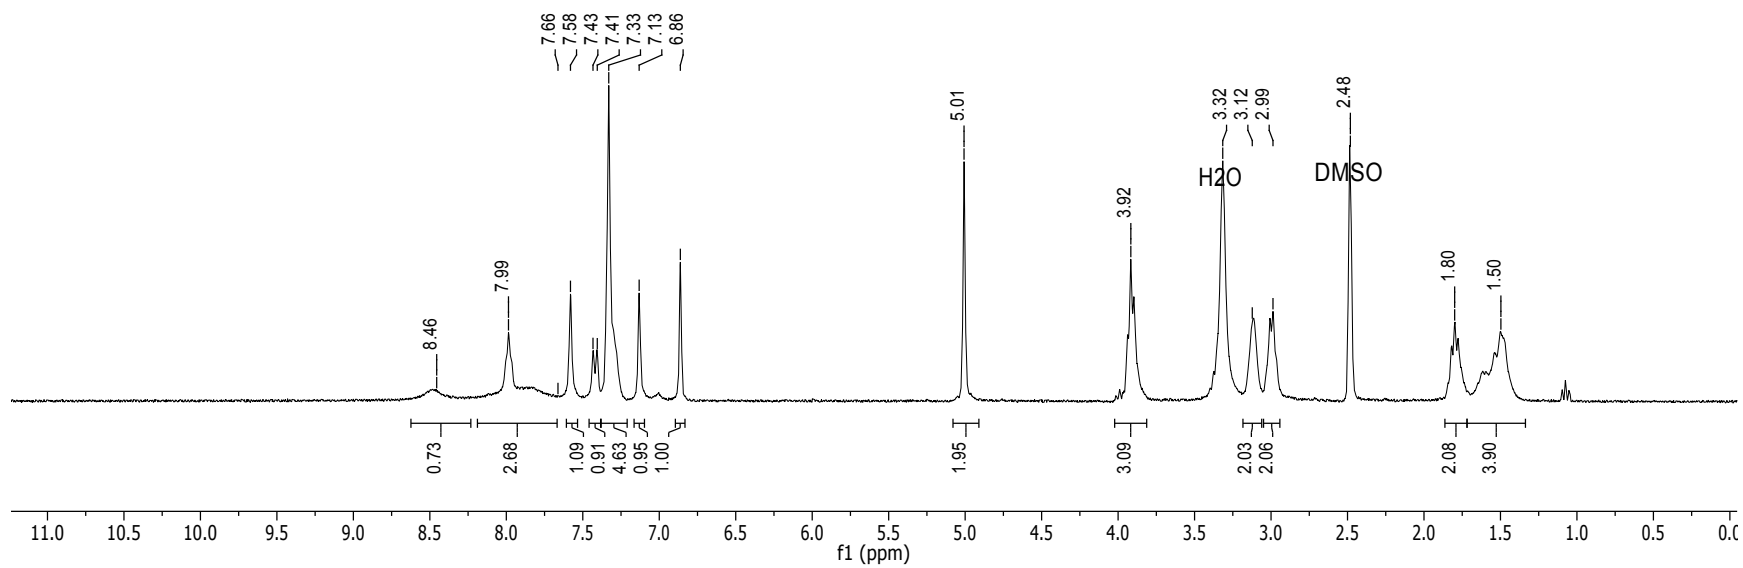

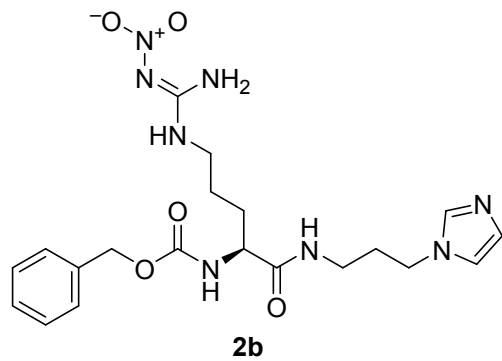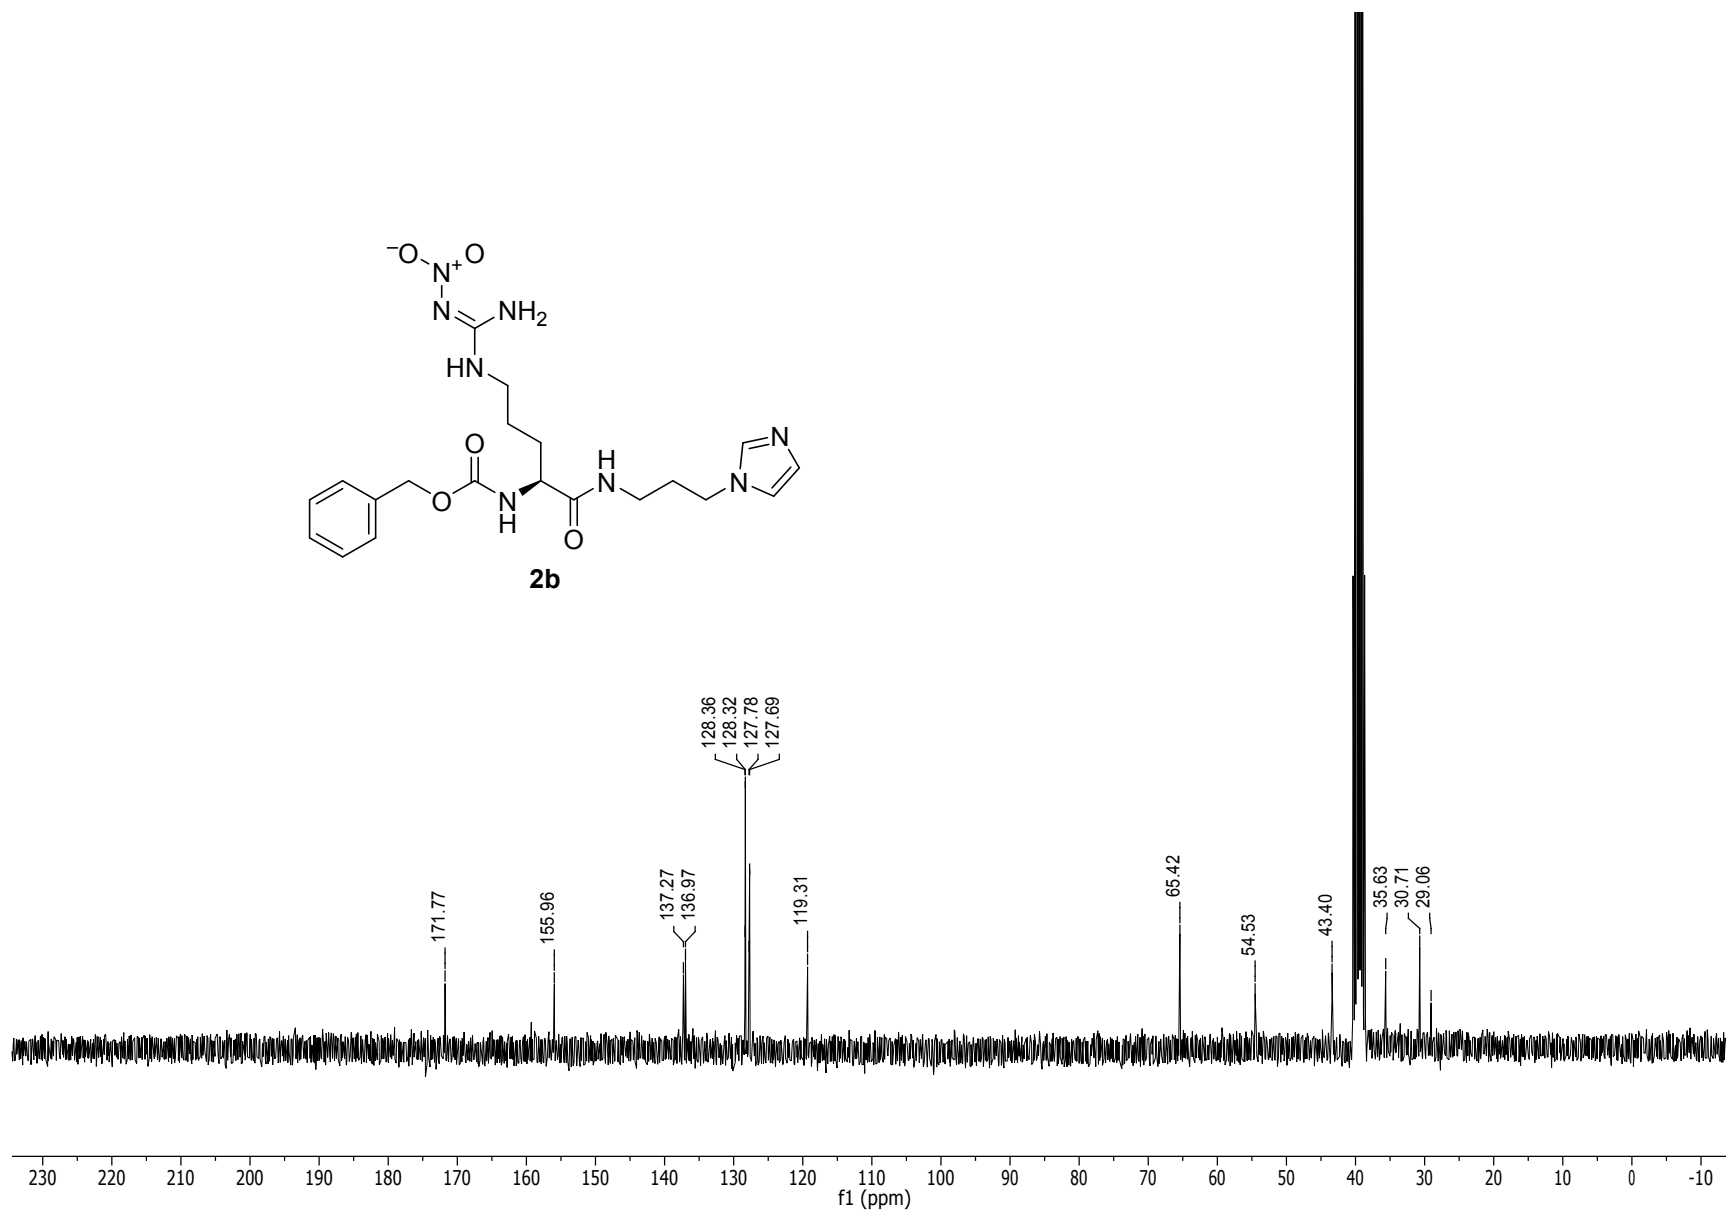

EAGER 200 Stripchart

Sample Ident. : 12 ArgPrImid      Filename : 282412  
 Analysed : 10-01-13 10:20:11      Printed : 10-01-2013 10:30:12

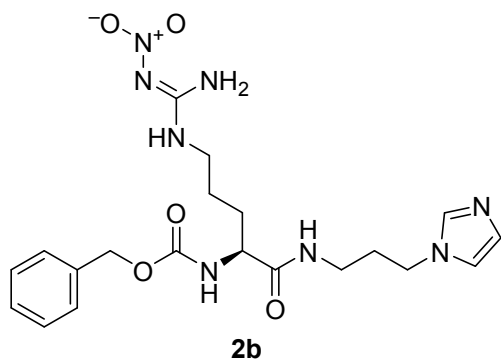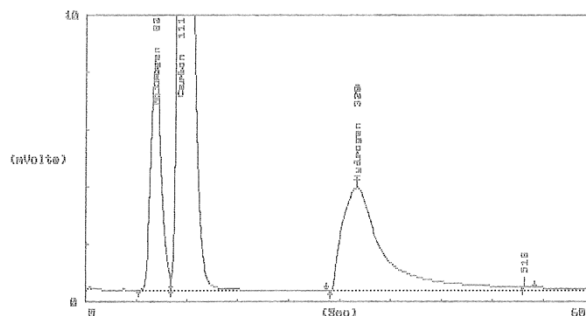

EAGER 200 Peak Integration Report

Instrument name : Instrument #1      Bline drift (fV): 34.4  
 Company Name : U of Florida      Operator Ident. : KOU  
 Analysed : 10-01-13 10:20:11      Printed : 10-01-2013 10:30:13  
 Sample Ident. : 12 ArgPrImid      Filename : 282412  
 Sample Weight : 2.153      Calc.method: using 'K. Factors'

| No. (#) | Type (#) | Start (Sec) | End (Sec) | Ret Time (Sec) | Height (fV) | Area (fV*Sec) | Area % (%) | Name     |
|---------|----------|-------------|-----------|----------------|-------------|---------------|------------|----------|
| 1       | FU       | 63          | 101       | 82             | 7818.3      | 106724        | 11.19      | Nitrogen |
| 2       | FU       | 101         | 284       | 111            | 43284.8     | 646486        | 67.81      | Carbon   |
| 3       | TL       | 289         | 598       | 320            | 3522.8      | 200115        | 20.99      | Hydrogen |
| 4       | CR       | 516         | 530       | 518            | 2.5         | 20            | 0.00       |          |

953345 100.00

EAGER 200 Unk Report

Instrument name : Instrument #1      Bline drift (fV): 34.4  
 Company Name : U of Florida      Operator Ident. : KOU  
 Analysed : 10-01-13 10:20:11      Printed : 10-01-2013 10:30:13  
 Sample Ident. : 12 ArgPrImid      Filename : 282412  
 Sample Weight : 2.153      Calc.method: using 'K. Factors'

| Pk. (#) | Ret Time (Sec) | Area (fV*Sec) | Element % (%) | Area Ratio  | Name     |
|---------|----------------|---------------|---------------|-------------|----------|
| 1       | 82             | 106724        | 24.120        | .605755E+01 | Nitrogen |
| 2       | 111            | 646486        | 52.254        | .100000E+01 | Carbon   |
| 3       | 320            | 200115        | 6.070         | .323057E+01 | Hydrogen |

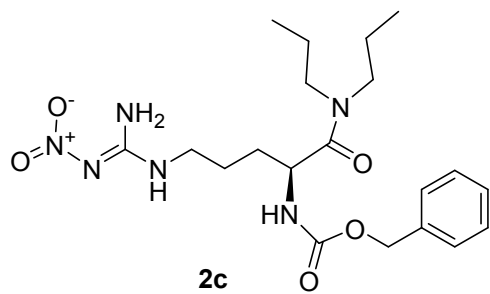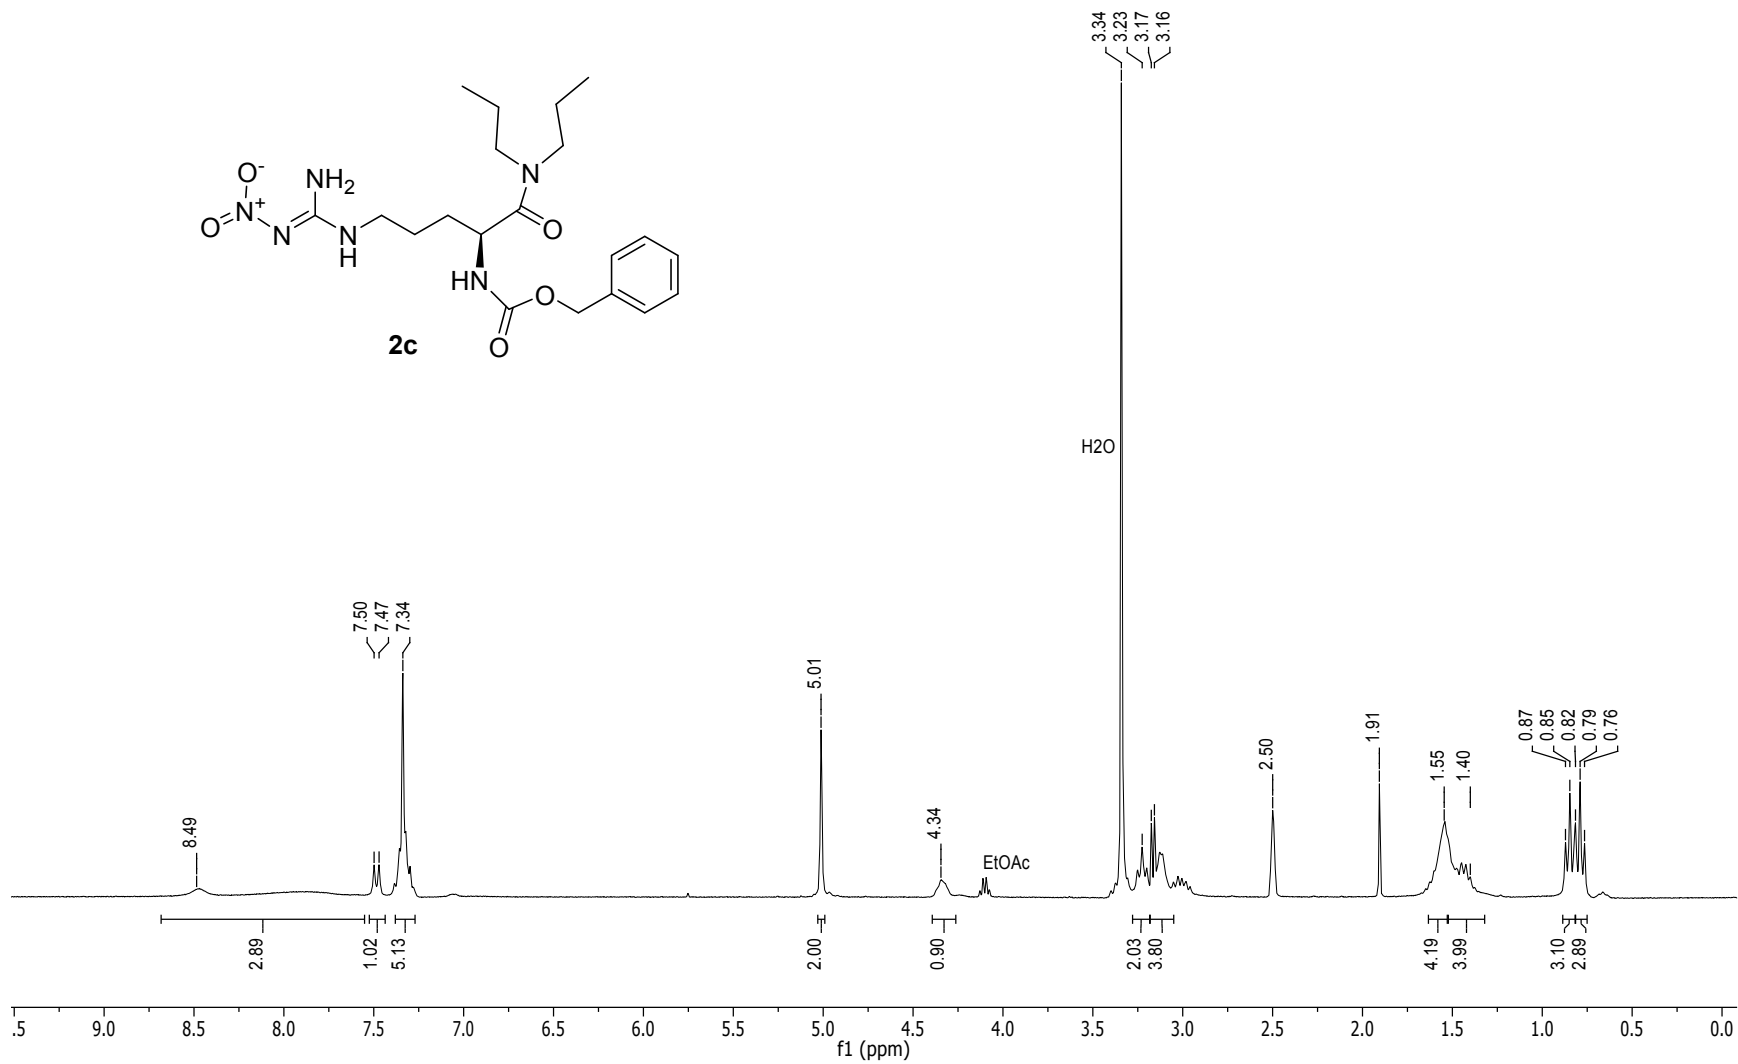

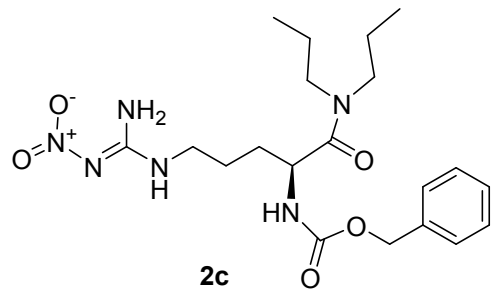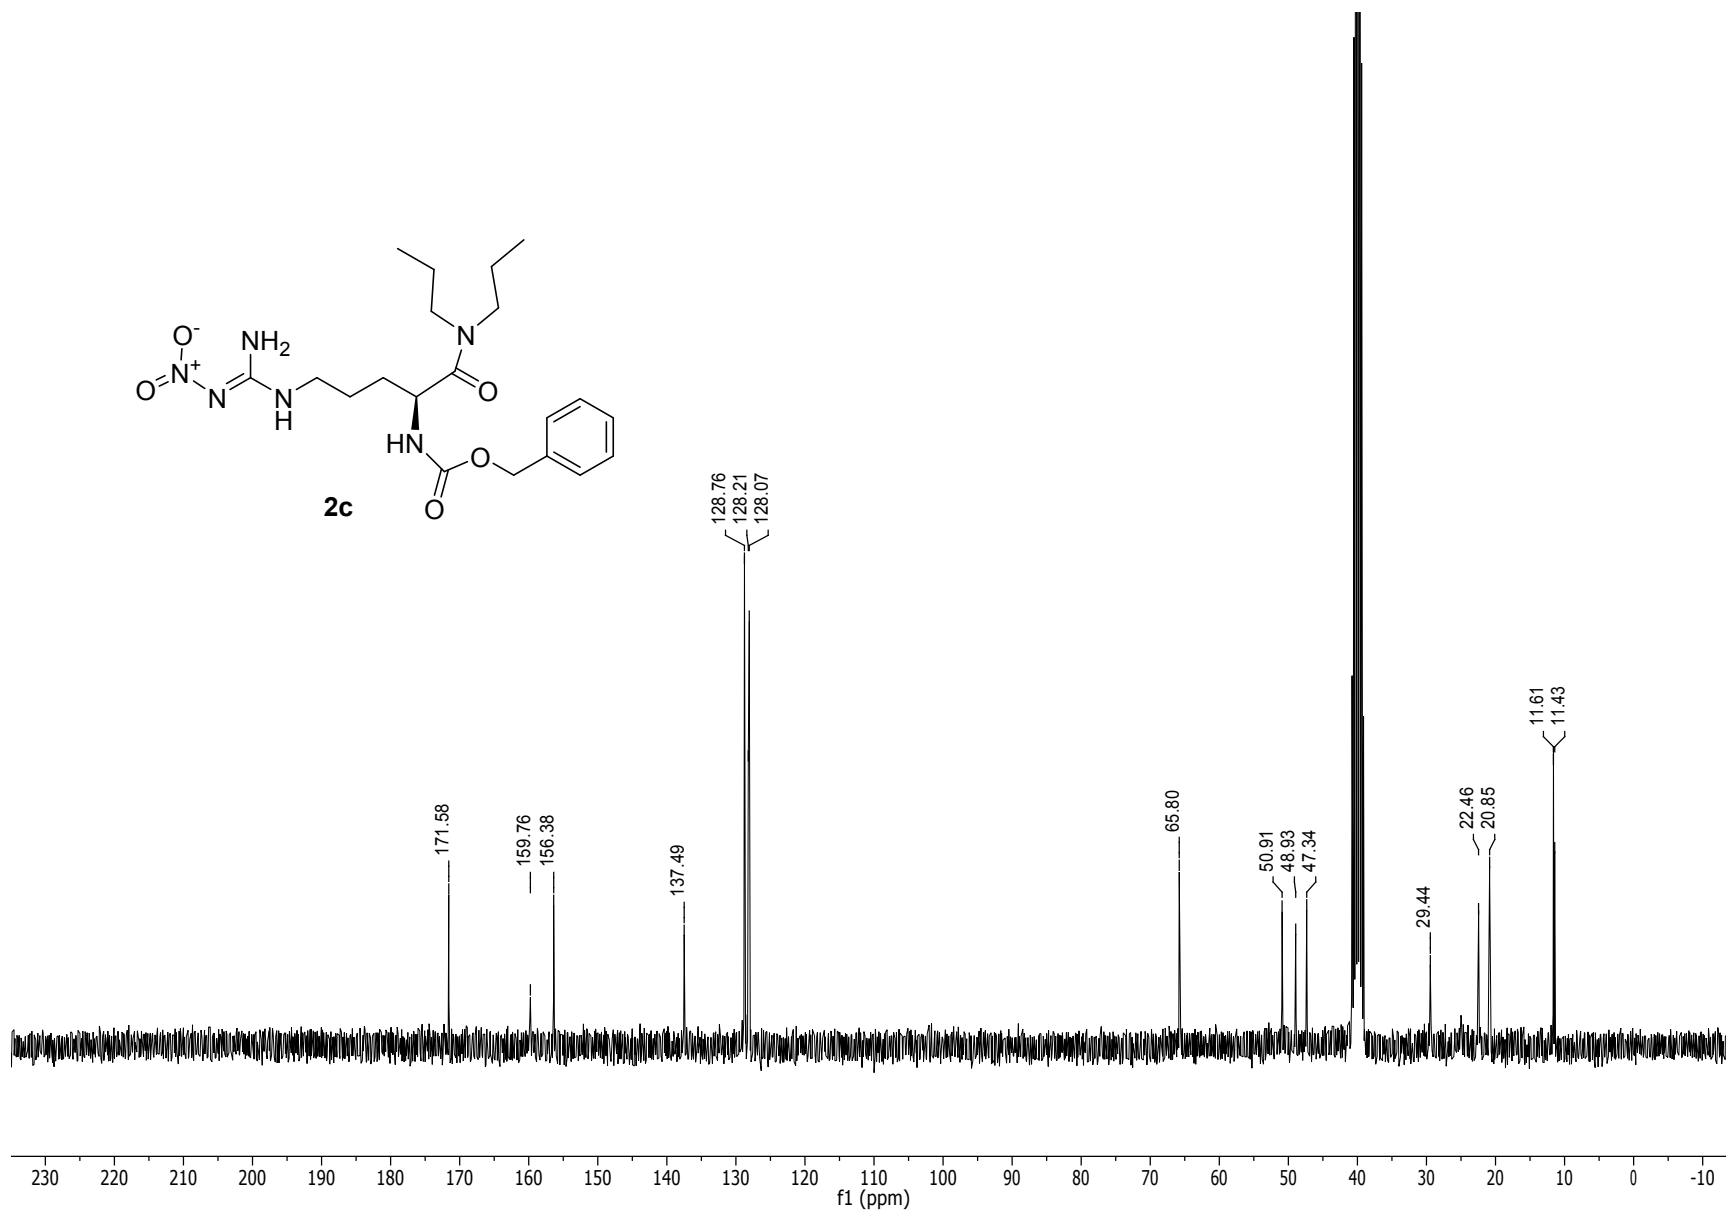

EAGER 200 Stripchart

Sample Ident. : 17 2146\_DipRAM      Filename : 284117  
 Analysed : 12-06-13 12:07:30      Printed : 12-06-2013 15:34:29

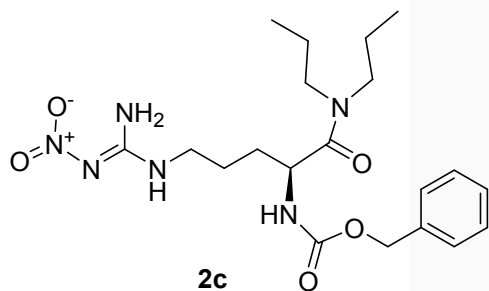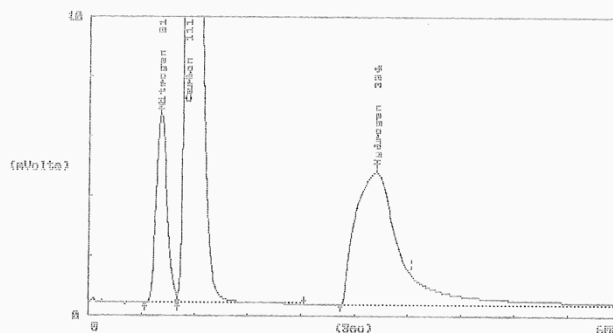

EAGER 200 Peak Integration Report

Instrument name : Instrument #1      Bline drift (fV):-4.6  
 Company Name : U of Florida      Operator Ident. : KOU  
 Analysed : 12-06-13 12:07:30      Printed : 12-06-2013 15:34:30  
 Sample Ident. : 17 2146\_DipRAM      Filename : 284117  
 Sample Weight : 2.127      Calc.method: using 'K. Factors'

| No. (#) | Type | Start (Sec) | End (Sec) | Ret Time (Sec) | Height (fV) | Area (fV*Sec) | Area % (%) | Name     |
|---------|------|-------------|-----------|----------------|-------------|---------------|------------|----------|
| 1       | FU   | 64          | 101       | 81             | 6243.9      | 83204         | 8.25       | Nitrogen |
| 2       | FU   | 101         | 243       | 111            | 44754.9     | 666948        | 66.17      | Carbon   |
| 3       | RS   | 284         | 597       | 324            | 4362.1      | 257856        | 25.58      | Hydrogen |

1008007 100.00

EAGER 200 Unk Report

Instrument name : Instrument #1      Bline drift (fV):-4.6  
 Company Name : U of Florida      Operator Ident. : KOU  
 Analysed : 12-06-13 12:07:30      Printed : 12-06-2013 15:34:30  
 Sample Ident. : 17 2146\_DipRAM      Filename : 284117  
 Sample Weight : 2.127      Calc.method: using 'K. Factors'

| Pk. (#) | Ret Time (Sec) | Area (fV*Sec) | Element % (%) | Area Ratio  | Name     |
|---------|----------------|---------------|---------------|-------------|----------|
| 1       | 81             | 83204         | 19.119        | .801586E+01 | Nitrogen |
| 2       | 111            | 666948        | 54.651        | .100000E+01 | Carbon   |
| 3       | 324            | 257856        | 7.796         | .258652E+01 | Hydrogen |

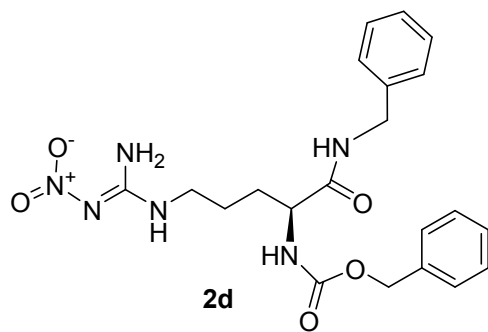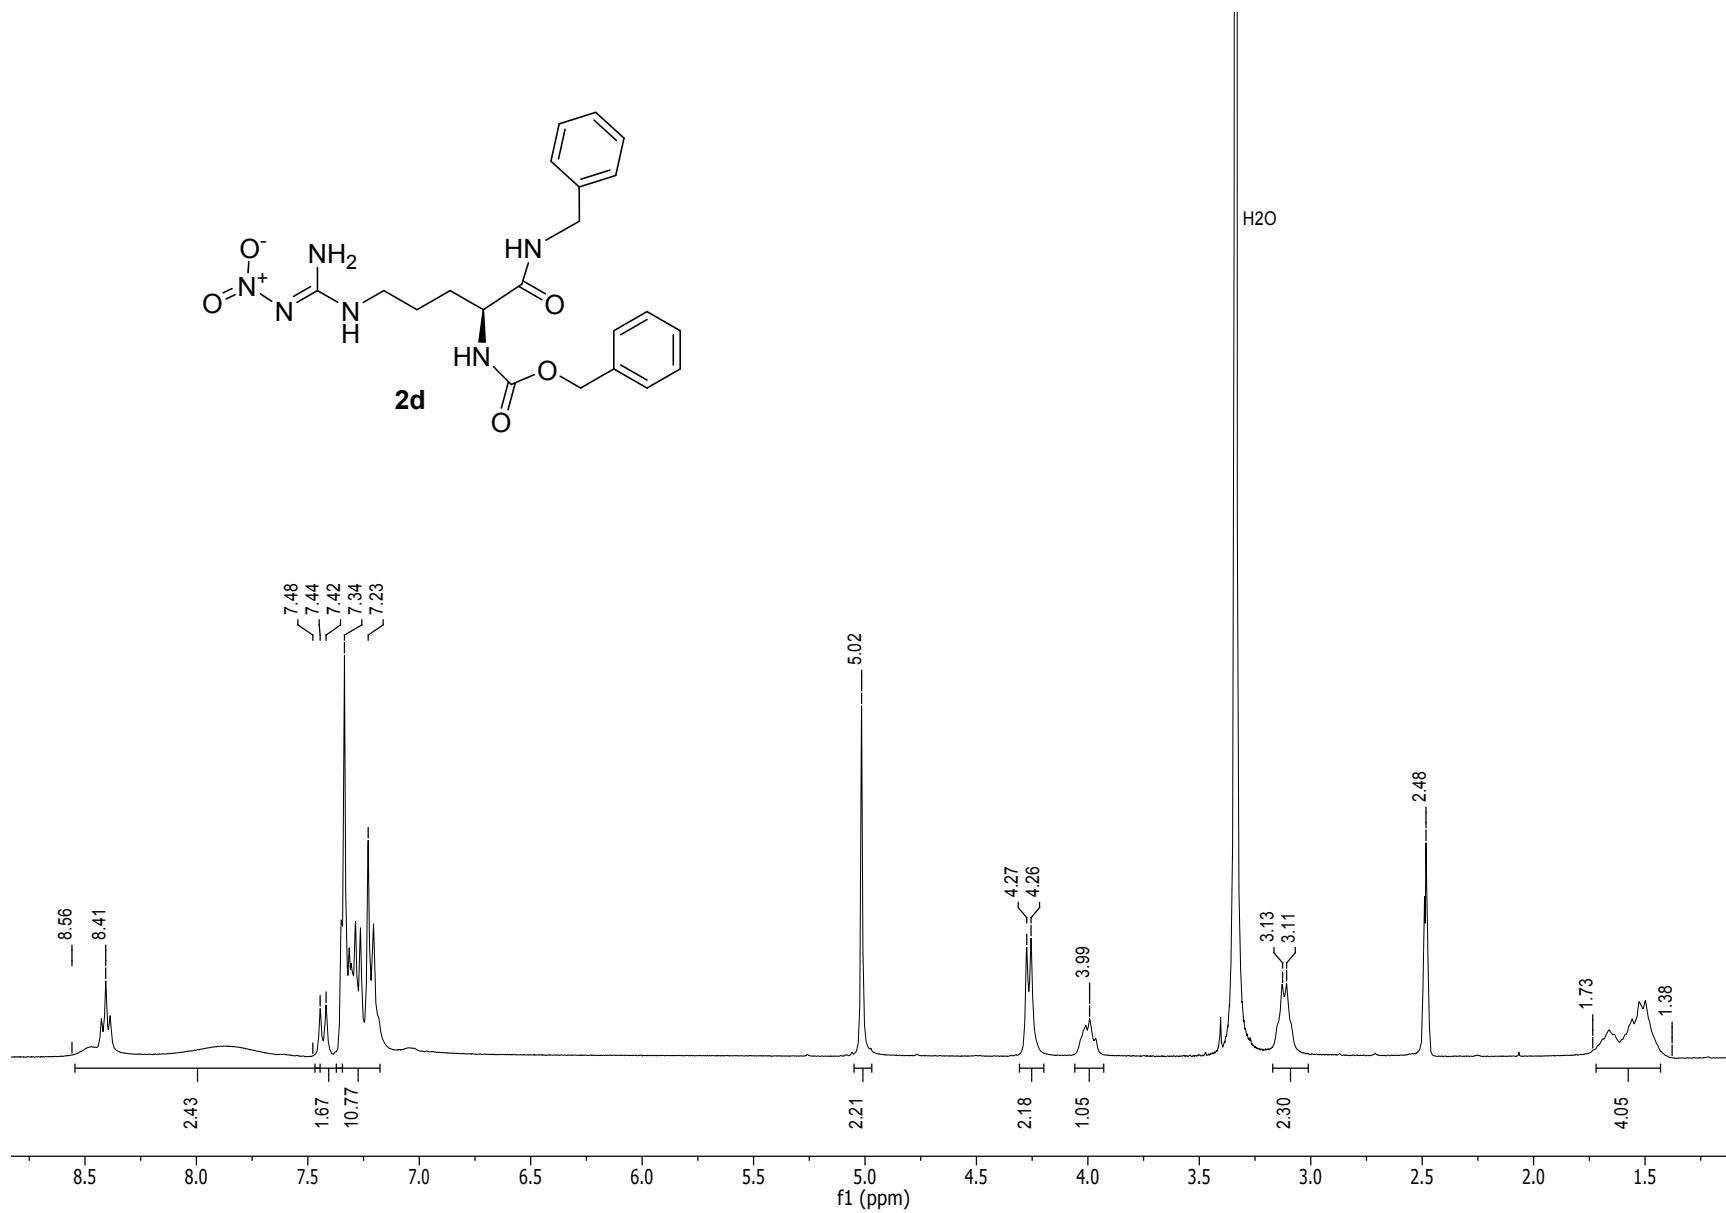

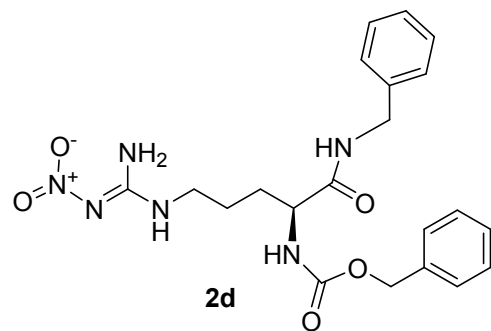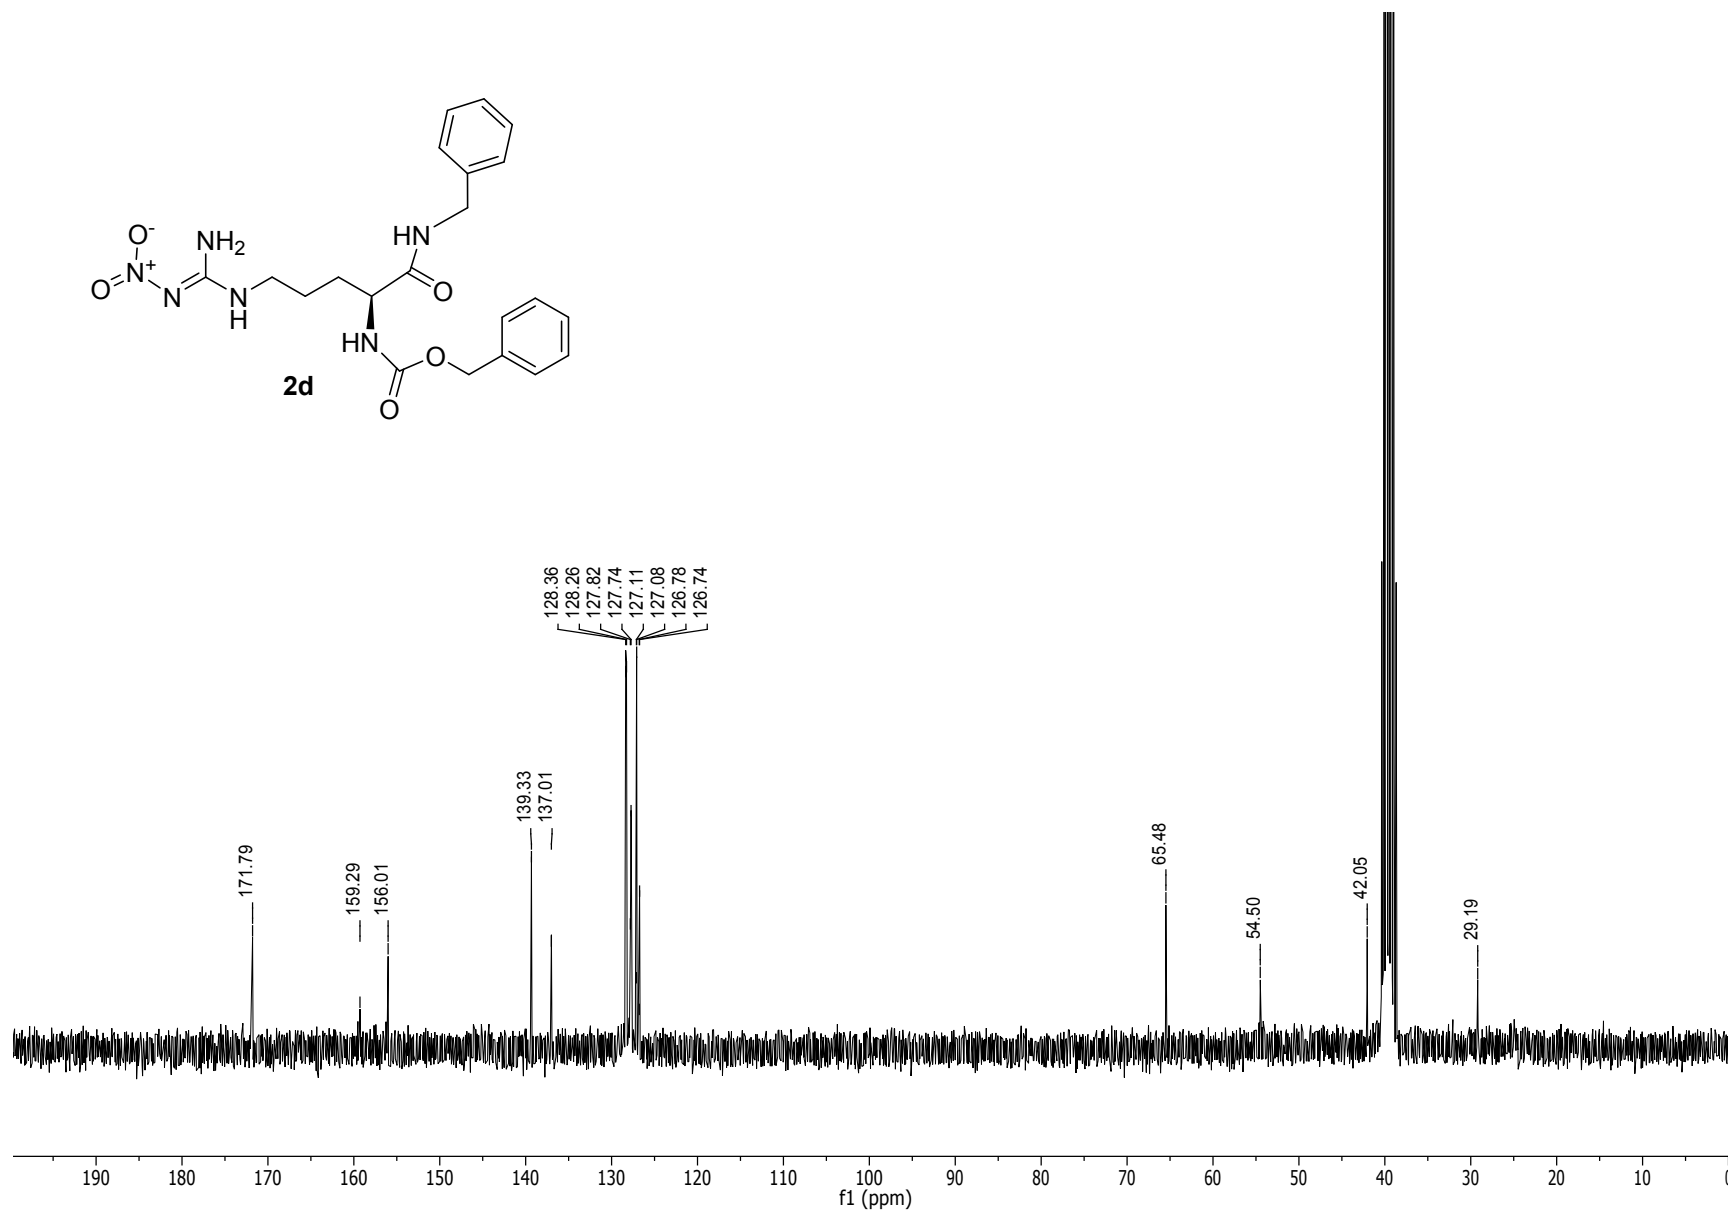



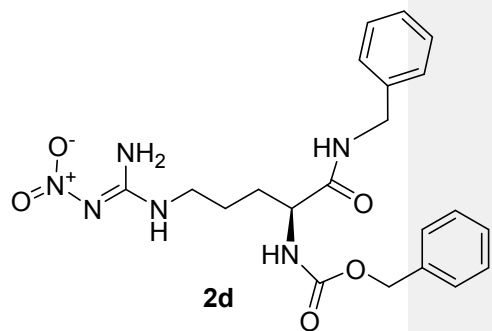

### EAGER 200 Stripchart

Sample Ident. : 33 2146\_BenzAmin    Filename : 284333  
 Analysed : 12-12-13 14:28:36    Printed : 12-12-2013 15:37:31

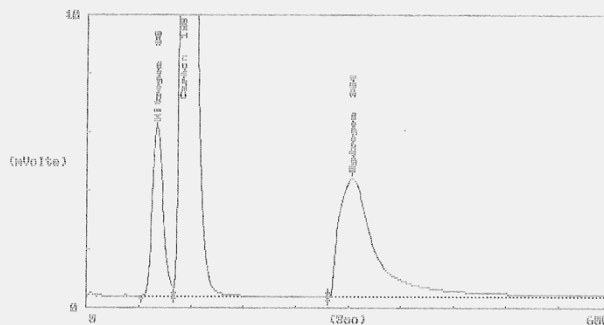

### EAGER 200 Peak Integration Report

Instrument name : Instrument #1    Bline drift (fV): 3.6  
 Company Name : U of Florida    Operator Ident. : KOU  
 Analysed : 12-12-13 14:28:36    Printed : 12-12-2013 15:37:31  
 Sample Ident. : 33 2146\_BenzAmin    Filename : 284333  
 Sample Weight : 2.062    Calc.method: using 'K. Factors'

| No. (#) | Type (#) | Start (Sec) | End (Sec) | Ret Time (Sec) | Height (fV) | Area (fV*Sec) | Area % (%) | Name     |  |
|---------|----------|-------------|-----------|----------------|-------------|---------------|------------|----------|--|
| 1       | FU       | 63          | 99        | 80             | 5719.2      | 75926         | 8.10       | Nitrogen |  |
| 2       | FU       | 99          | 277       | 109            | 45333.0     | 664024        | 70.85      | Carbon   |  |
| 3       | RS       | 277         | 597       | 304            | 3991.2      | 197310        | 21.05      | Hydrogen |  |
|         |          |             |           |                |             |               | 937260     | 100.00   |  |

### EAGER 200 Unk Report

Instrument name : Instrument #1    Bline drift (fV): 3.6  
 Company Name : U of Florida    Operator Ident. : KOU  
 Analysed : 12-12-13 14:28:36    Printed : 12-12-2013 15:37:31  
 Sample Ident. : 33 2146\_BenzAmin    Filename : 284333  
 Sample Weight : 2.062    Calc.method: using 'K. Factors'

| Pk. (#) | Ret Time (Sec) | Area (fV*Sec) | Element % (%) | Area Ratio  | Name     |
|---------|----------------|---------------|---------------|-------------|----------|
| 1       | 80             | 75926         | 19.114        | .874566E+01 | Nitrogen |
| 2       | 109            | 664024        | 56.698        | .100000E+01 | Carbon   |
| 3       | 304            | 197310        | 6.304         | .336538E+01 | Hydrogen |

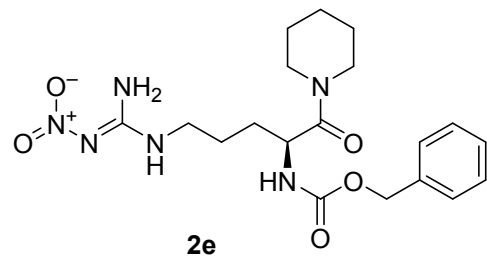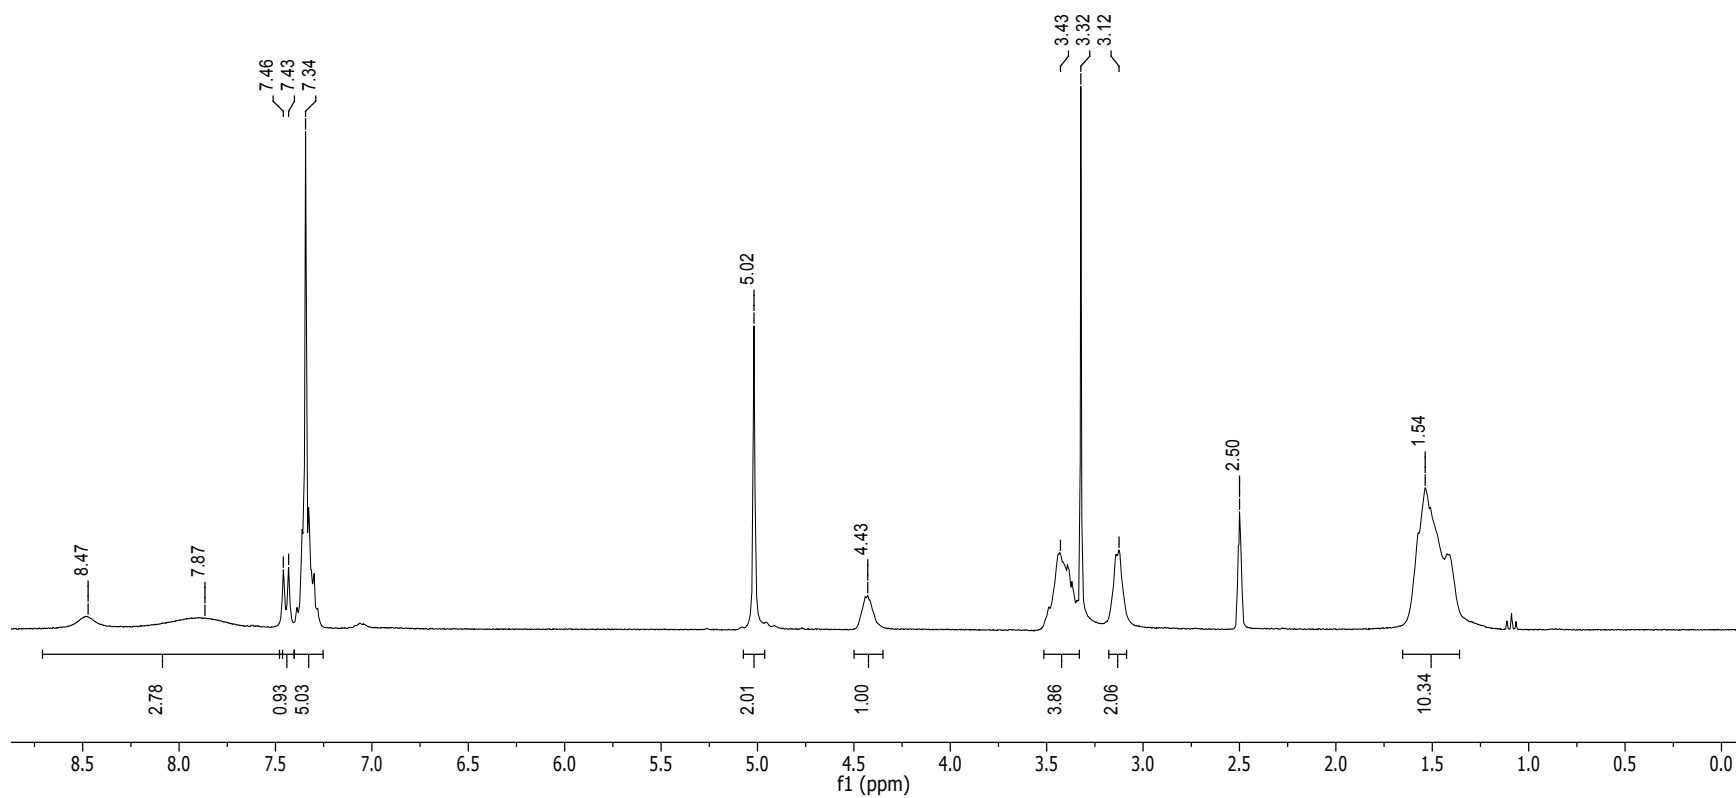

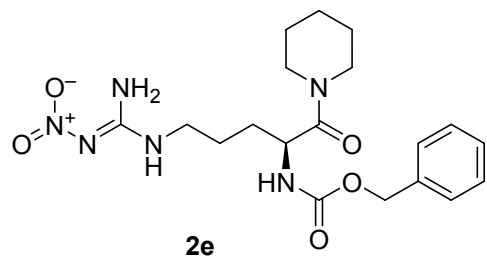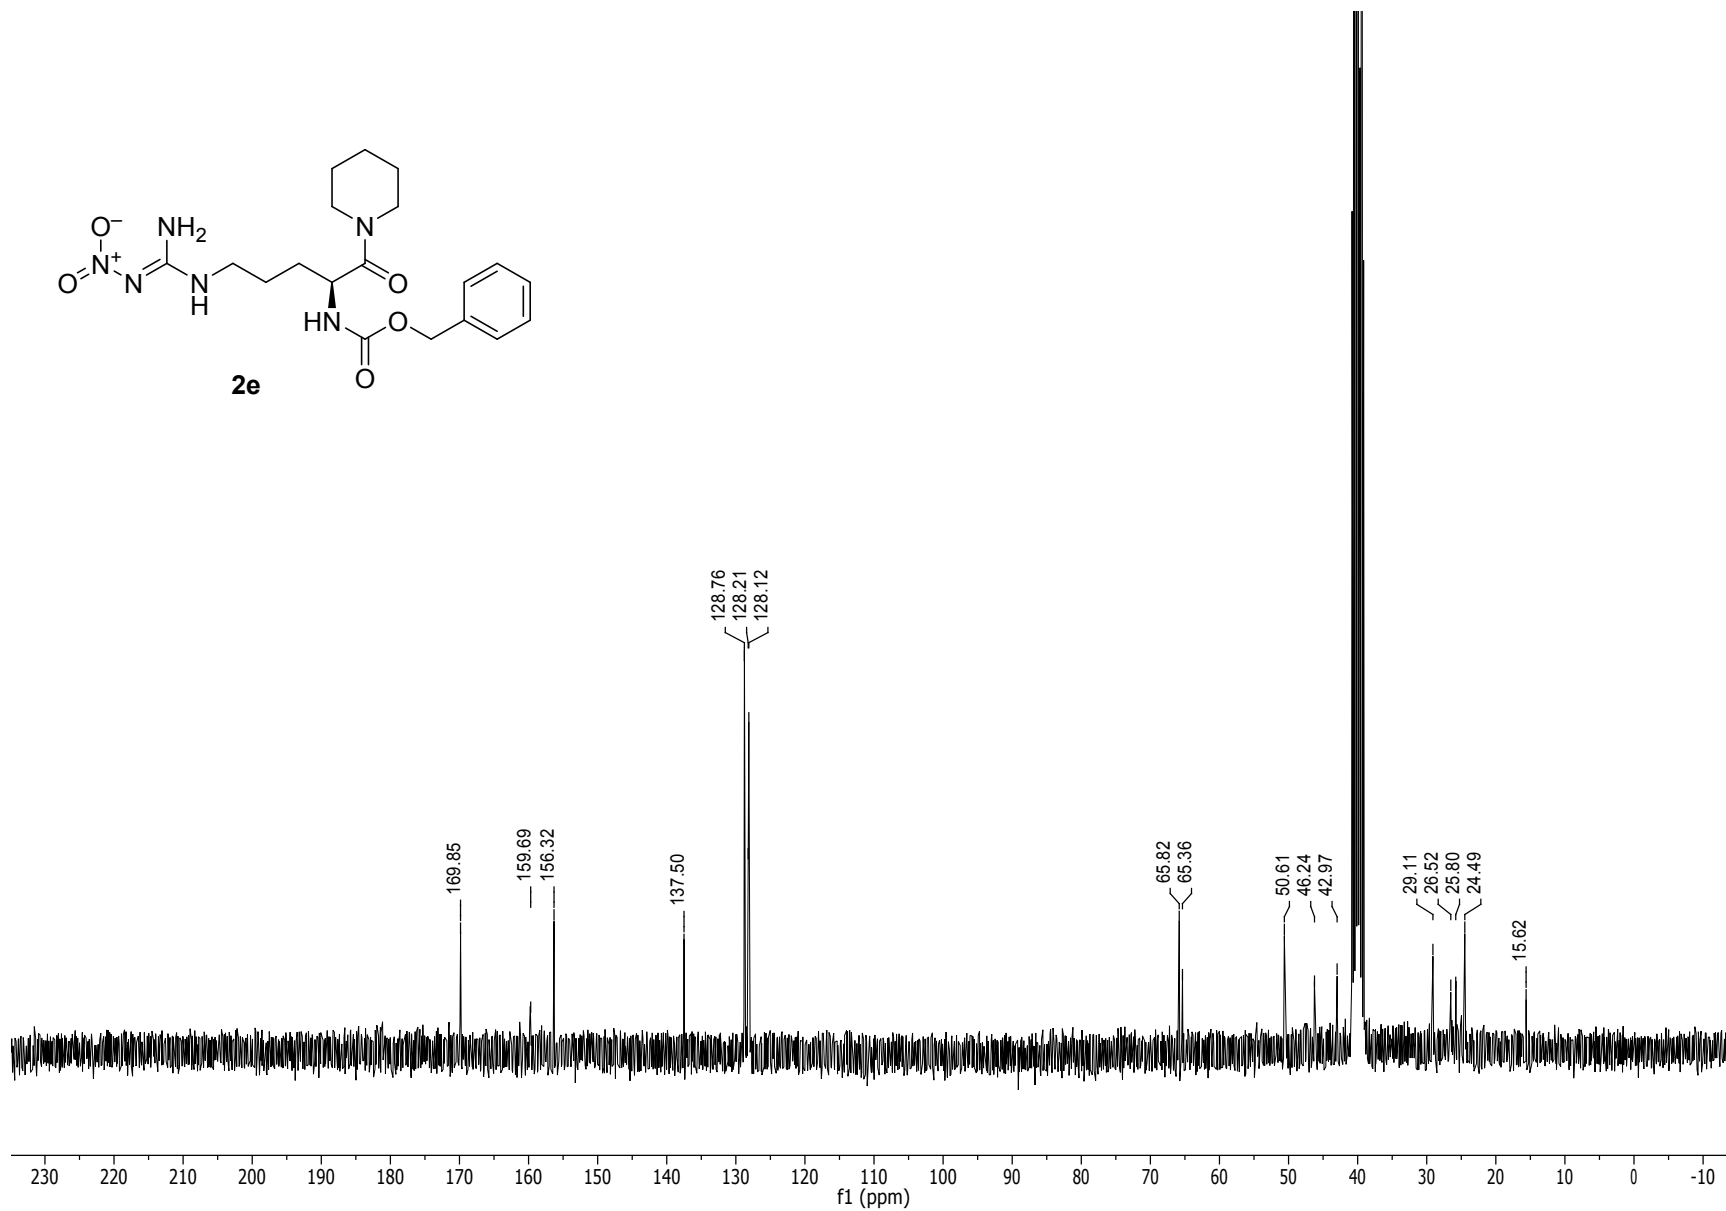

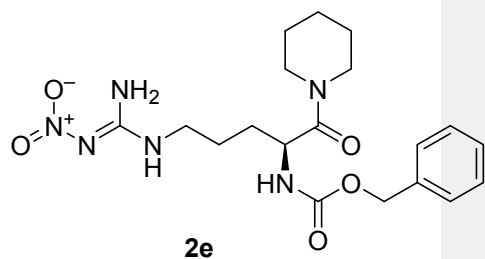

### EAGER 200 Stripehart

Sample Ident. : 16 2146\_Piperidine Filename : 285116  
 Analysed : 02-06-14 11:51:10 Printed : 02-06-2014 12:01:13

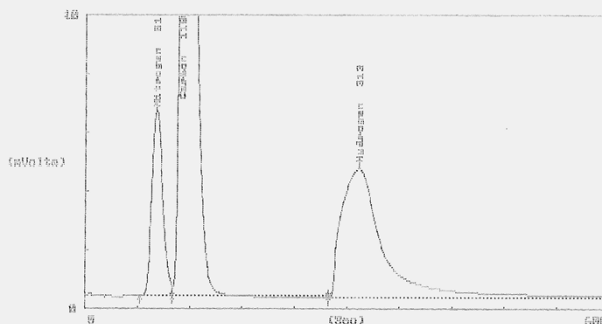

### EAGER 200 Peak Integration Report

Instrument name : Instrument #1 Bline drift (fV): 2.8  
 Company Name : U of Florida Operator Ident. : KOU  
 Analysed : 02-06-14 11:51:10 Printed : 02-06-2014 12:01:13  
 Sample Ident. : 16 2146\_Piperidine Filename : 285116  
 Sample Weight : 2.151 Calc.method: using 'K. Factors'

| No. (#) | Type (#) | Start (Sec) | End (Sec) | Ret Time (Sec) | Height (fV) | Area (fV*Sec) | Area % (%) | Name     |
|---------|----------|-------------|-----------|----------------|-------------|---------------|------------|----------|
| 1       | FU       | 63          | 100       | 81             | 6280.3      | 85496         | 8.63       | Nitrogen |
| 2       | FU       | 100         | 279       | 110            | 44592.7     | 669270        | 67.53      | Carbon   |
| 3       | RS       | 279         | 593       | 313            | 4329.3      | 236239        | 23.84      | Hydrogen |

991005 100.00

### EAGER 200 Unk Report

Instrument name : Instrument #1 Bline drift (fV): 2.8  
 Company Name : U of Florida Operator Ident. : KOU  
 Analysed : 02-06-14 11:51:10 Printed : 02-06-2014 12:01:13  
 Sample Ident. : 16 2146\_Piperidine Filename : 285116  
 Sample Weight : 2.151 Calc.method: using 'K. Factors'

| Pk. (#) | Ret Time (Sec) | Area (fV*Sec) | Element % (%) | Area Ratio  | Name     |
|---------|----------------|---------------|---------------|-------------|----------|
| 1       | 81             | 85496         | 20.321        | .782810E+01 | Nitrogen |
| 2       | 110            | 669270        | 53.896        | .100000E+01 | Carbon   |
| 3       | 313            | 236239        | 7.031         | .283302E+01 | Hydrogen |

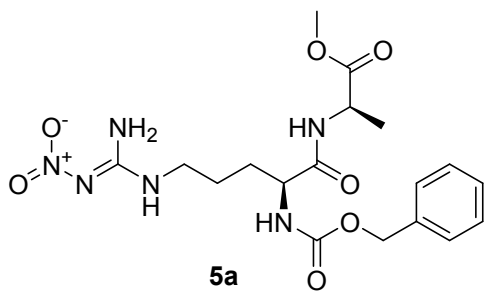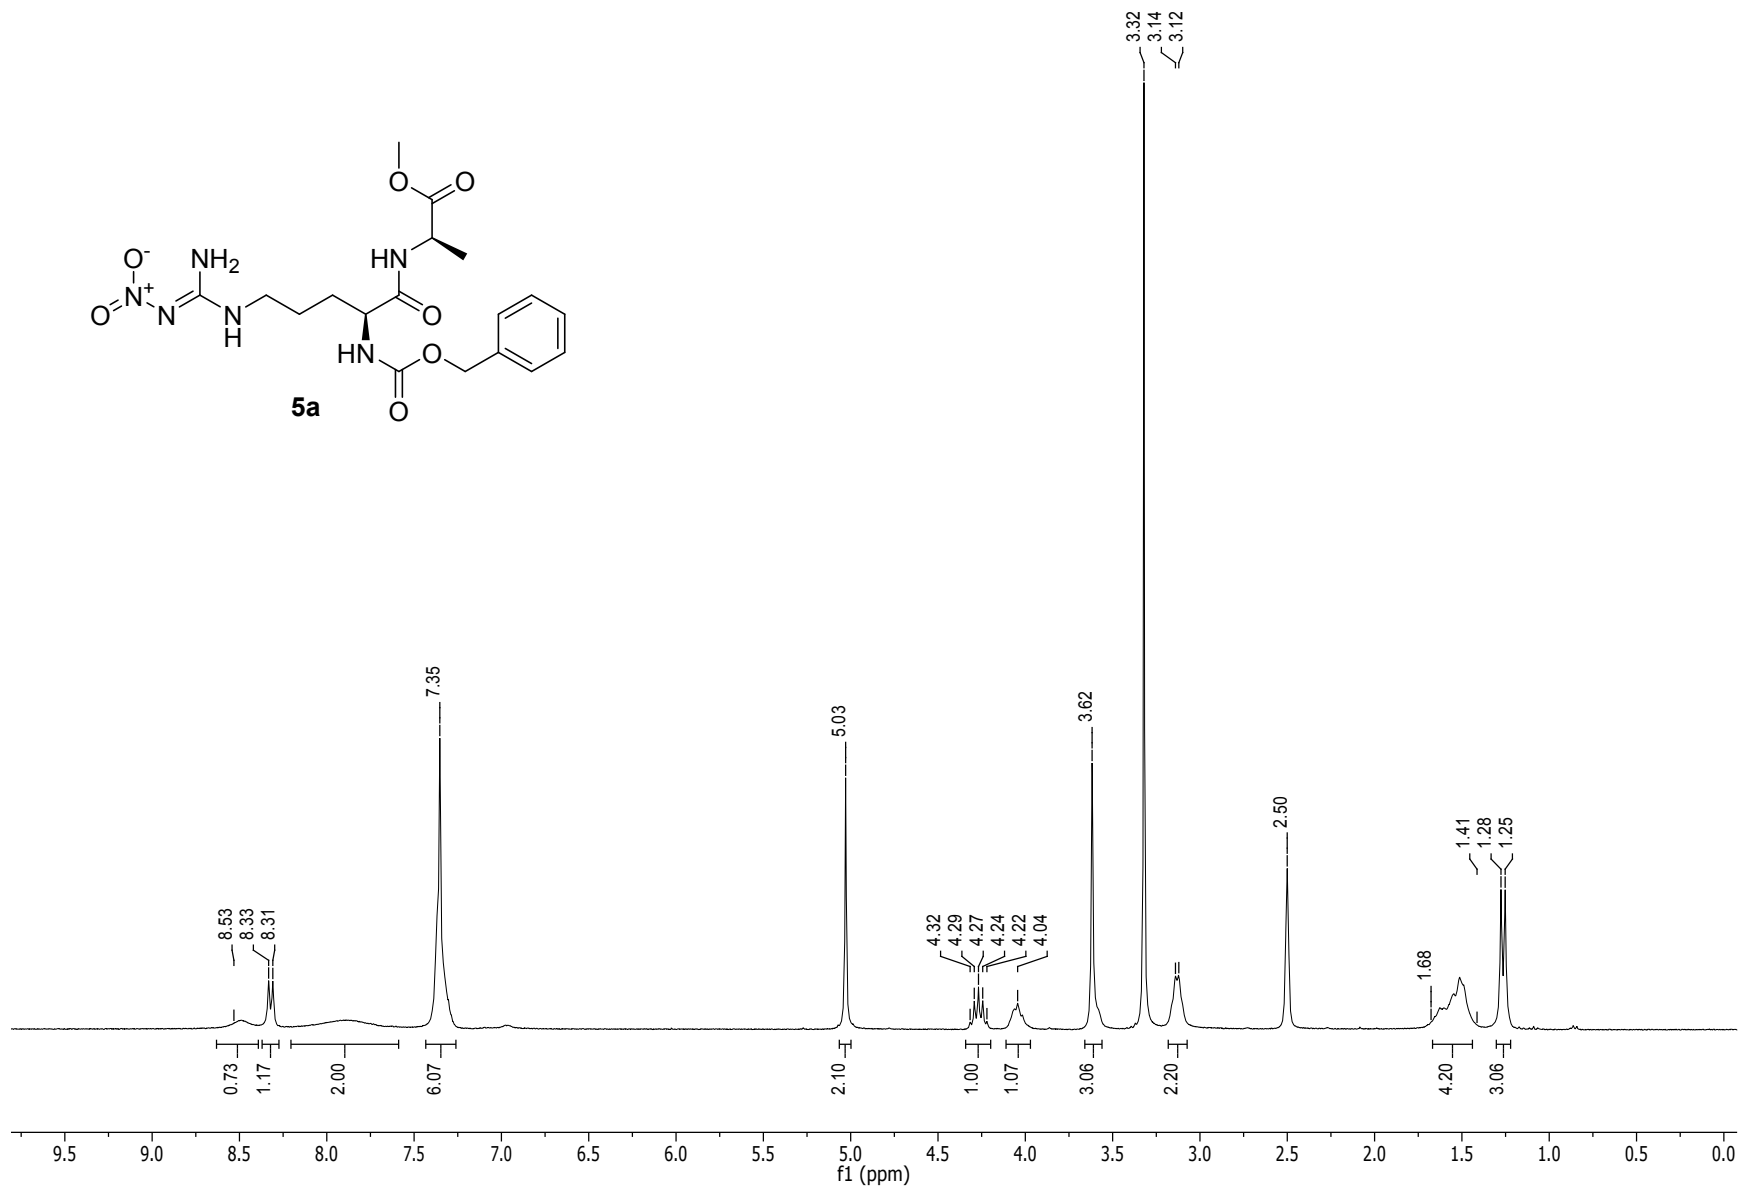

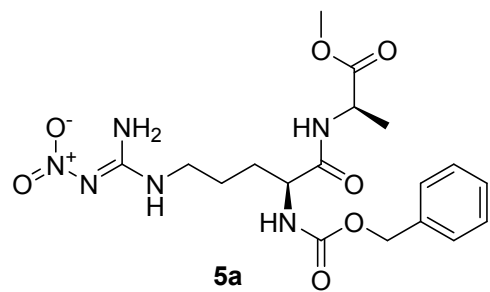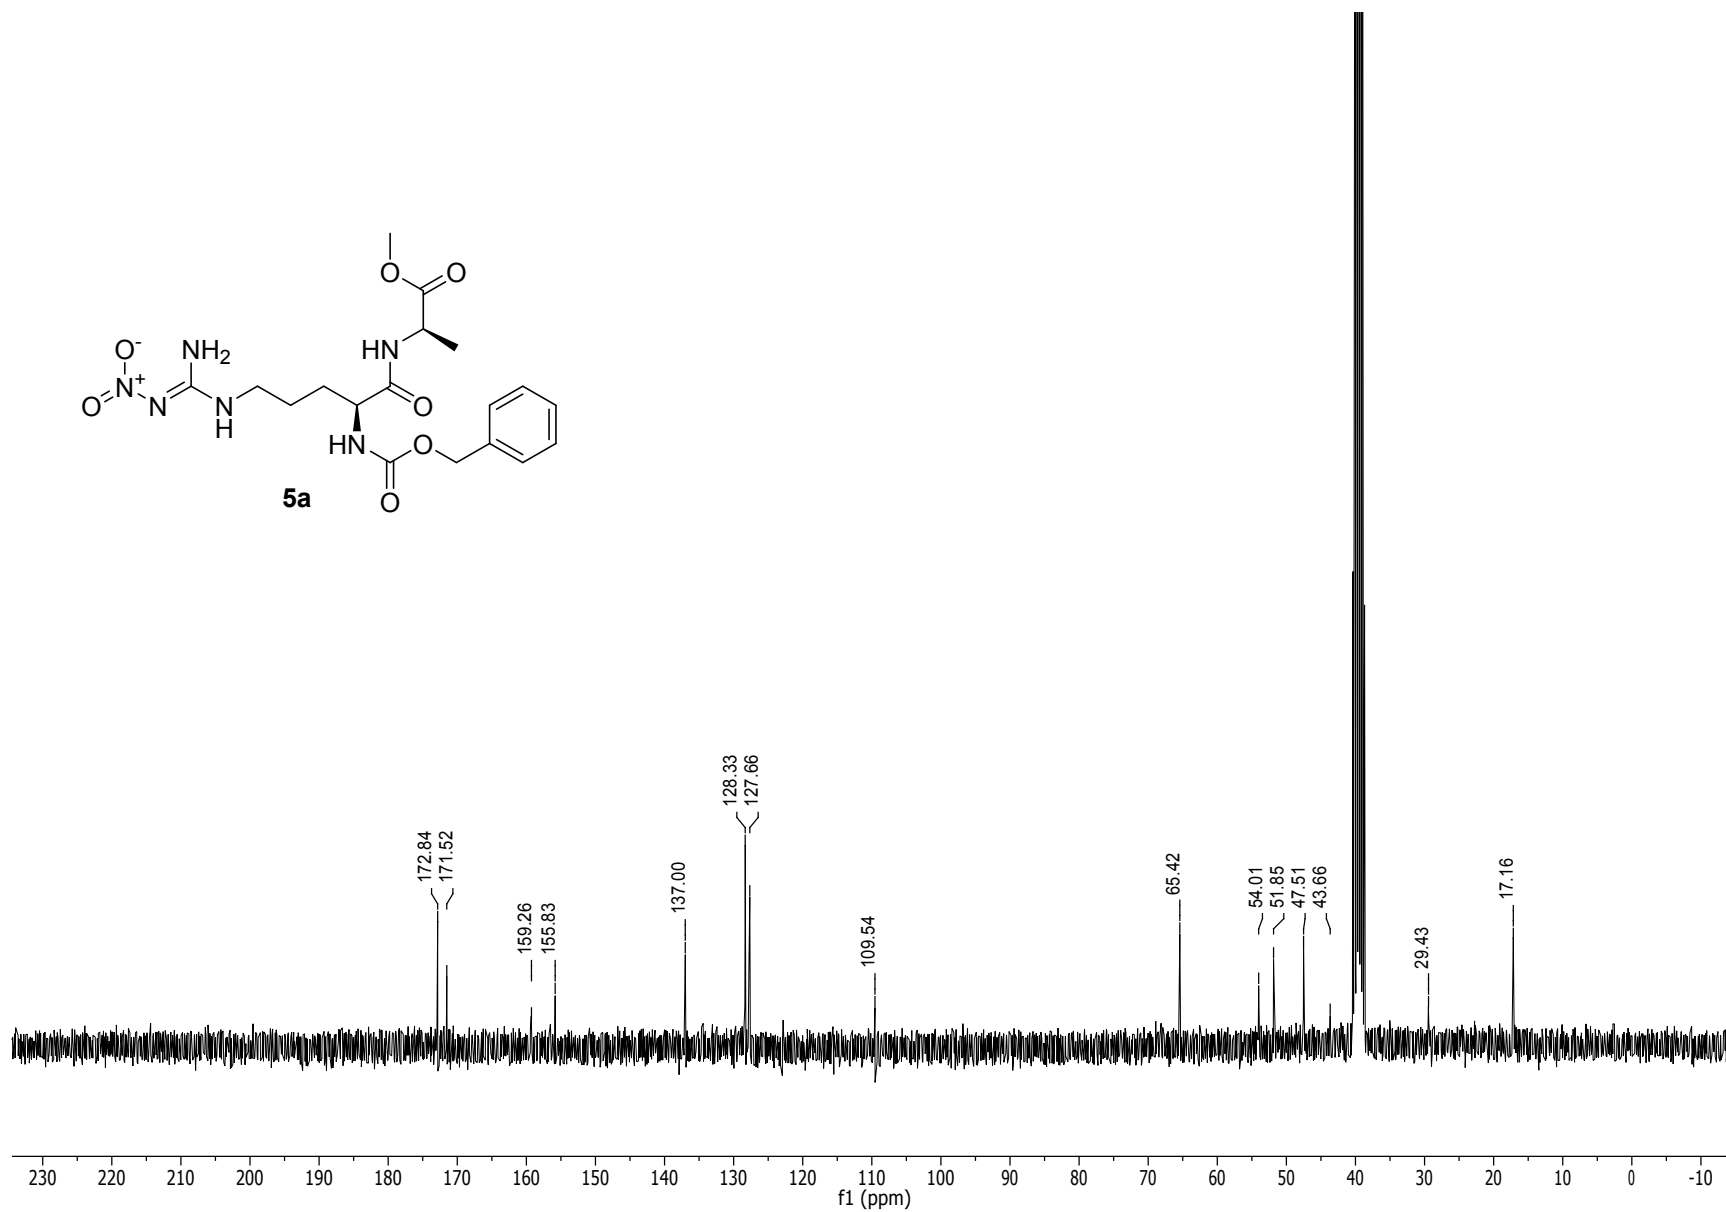

EAGER 200 Stripchart

Sample Ident. : 20 2146\_AlaOMe      Filename : 284520  
 Analysed : 12-24-13 12:33:16      Printed : 12-24-2013 12:52:35

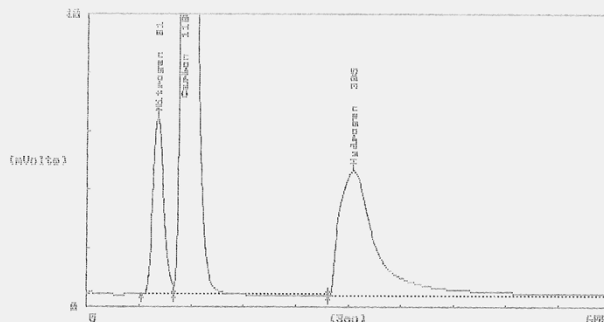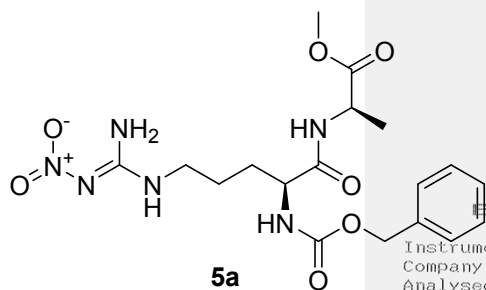

EAGER 200 Peak Integration Report

Instrument name : Instrument #1      Bline drift (fV):-14.7  
 Company Name : U of Florida      Operator Ident. : KOU  
 Analysed : 12-24-13 12:33:16      Printed : 12-24-2013 12:52:36  
 Sample Ident. : 20 2146\_AlaOMe      Filename : 284520  
 Sample Weight : 2.184      Calc.method: using 'K. Factors'

| No. (#) | Type (#) | Start (Sec) | End (Sec) | Ret Time (Sec) | Height (fV) | Area (fV*Sec) | Area % (%) | Name     |
|---------|----------|-------------|-----------|----------------|-------------|---------------|------------|----------|
| 1       | FU       | 63          | 100       | 81             | 6012.0      | 81032         | 2.00       | Nitrogen |
| 2       | FU       | 100         | 277       | 110            | 41337.1     | 609287        | 67.70      | Carbon   |
| 3       | RS       | 277         | 597       | 305            | 4194.6      | 209630        | 23.29      | Hydrogen |

899949 100.00

EAGER 200 Unk Report

Instrument name : Instrument #1      Bline drift (fV):-14.7  
 Company Name : U of Florida      Operator Ident. : KOU  
 Analysed : 12-24-13 12:33:16      Printed : 12-24-2013 12:52:36  
 Sample Ident. : 20 2146\_AlaOMe      Filename : 284520  
 Sample Weight : 2.184      Calc.method: using 'K. Factors'

| Pk. (#) | Ret Time (Sec) | Area (fV*Sec) | Element % (%) | Area Ratio  | Name     |
|---------|----------------|---------------|---------------|-------------|----------|
| 1       | 81             | 81032         | 19.543        | .751910E+01 | Nitrogen |
| 2       | 110            | 609287        | 49.234        | .100000E+01 | Carbon   |
| 3       | 305            | 209630        | 6.368         | .290648E+01 | Hydrogen |

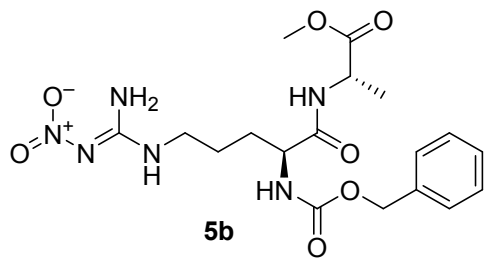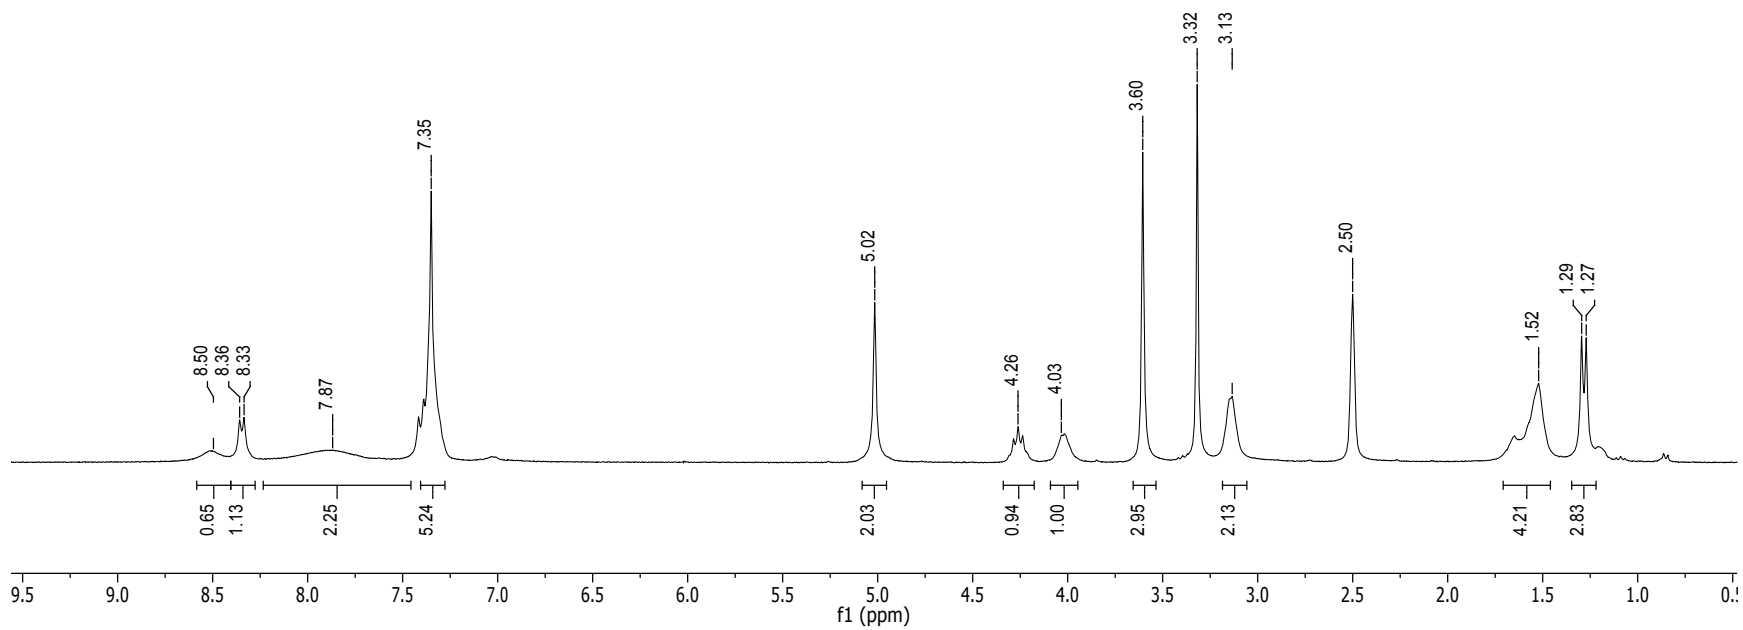



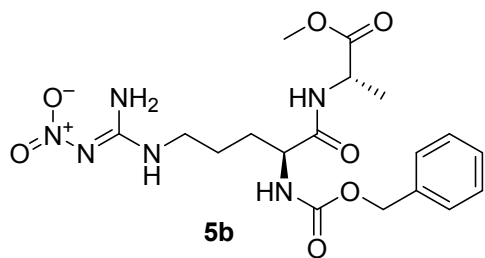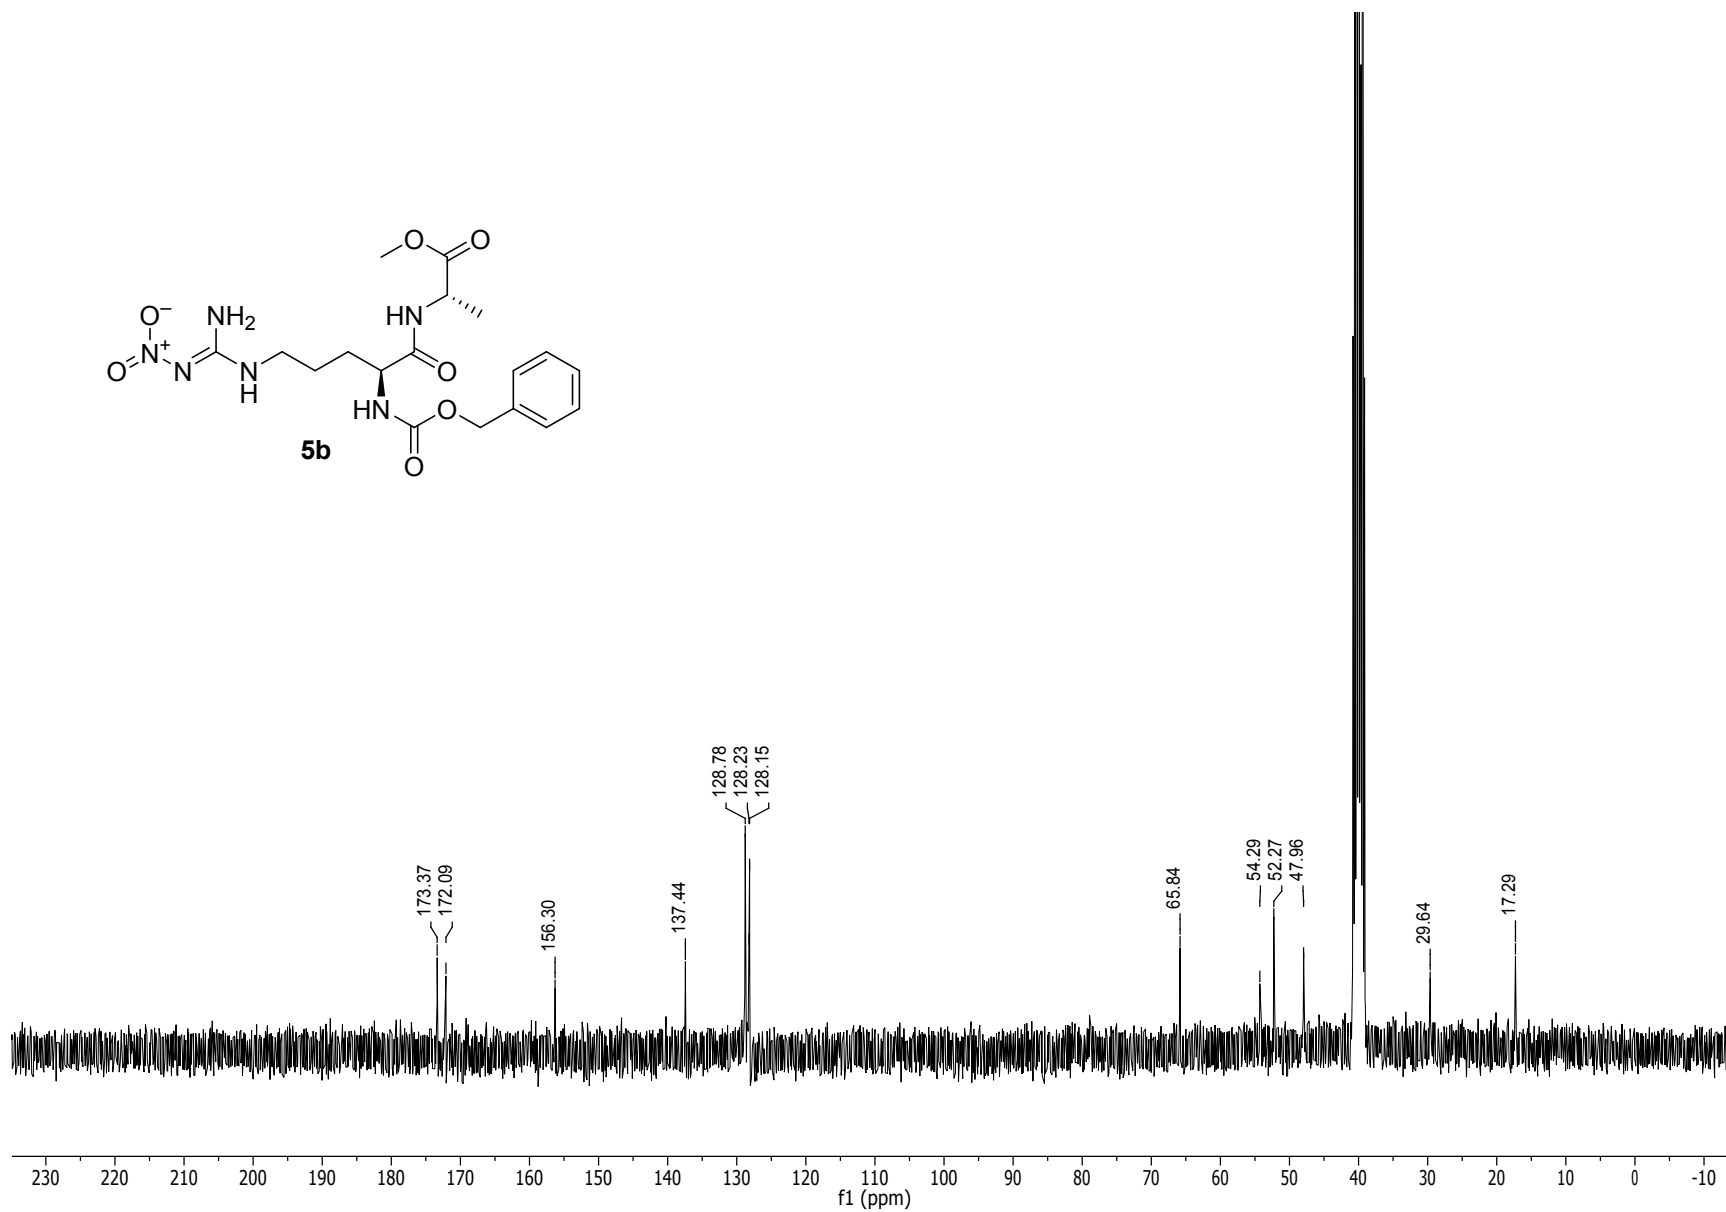

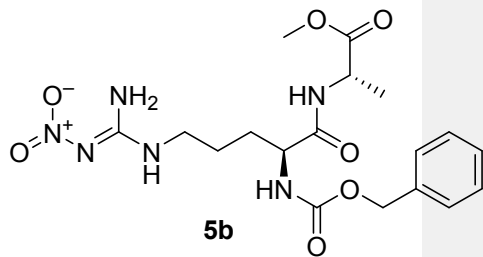

### EAGER 200 Stripchart

Sample Ident. : 17 2146\_LAlaOMe      Filename : 285317  
 Analysed : 02-18-14 12:50:41      Printed : 02-18-2014 14:43:42

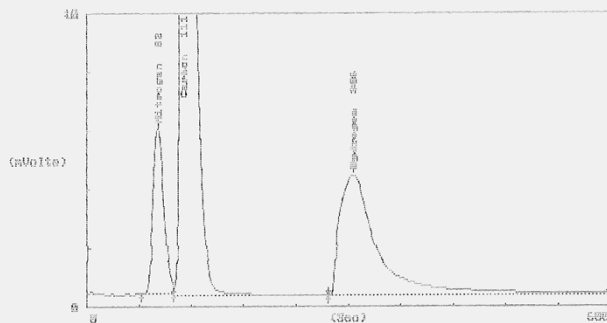

### EAGER 200 Peak Integration Report

Instrument name : Instrument #1      Bline drift (fV): 2.9  
 Company Name : U of Florida      Operator Ident. : KOU  
 Analysed : 02-18-14 12:50:41      Printed : 02-18-2014 14:43:42  
 Sample Ident. : 17 2146\_LAlaOMe      Filename : 285317  
 Sample Weight : 2.117      Calc.method: using 'K. Factors'

| No. (#) | Type (#) | Start (Sec) | End (Sec) | Ret Time (Sec) | Height (fV) | Area (fV*Sec) | Area % (%) | Name     |
|---------|----------|-------------|-----------|----------------|-------------|---------------|------------|----------|
| 1       | FU       | 63          | 100       | 82             | 5617.5      | 76964         | 8.82       | Nitrogen |
| 2       | FU       | 100         | 277       | 111            | 39832.6     | 593287        | 67.96      | Carbon   |
| 3       | RS       | 277         | 593       | 306            | 4054.5      | 202724        | 23.22      | Hydrogen |
|         |          |             |           |                |             |               | 872976     | 100.00   |

### EAGER 200 Unk Report

Instrument name : Instrument #1      Bline drift (fV): 2.9  
 Company Name : U of Florida      Operator Ident. : KOU  
 Analysed : 02-18-14 12:50:41      Printed : 02-18-2014 14:43:42  
 Sample Ident. : 17 2146\_LAlaOMe      Filename : 285317  
 Sample Weight : 2.117      Calc.method: using 'K. Factors'

| Pk. (#) | Ret Time (Sec) | Area (fV*Sec) | Element % (%) | Area Ratio  | Name     |
|---------|----------------|---------------|---------------|-------------|----------|
| 1       | 82             | 76964         | 18.813        | .770860E+01 | Nitrogen |
| 2       | 111            | 593287        | 49.001        | .100000E+01 | Carbon   |
| 3       | 306            | 202724        | 6.229         | .292657E+01 | Hydrogen |

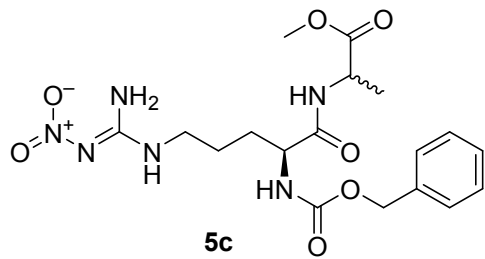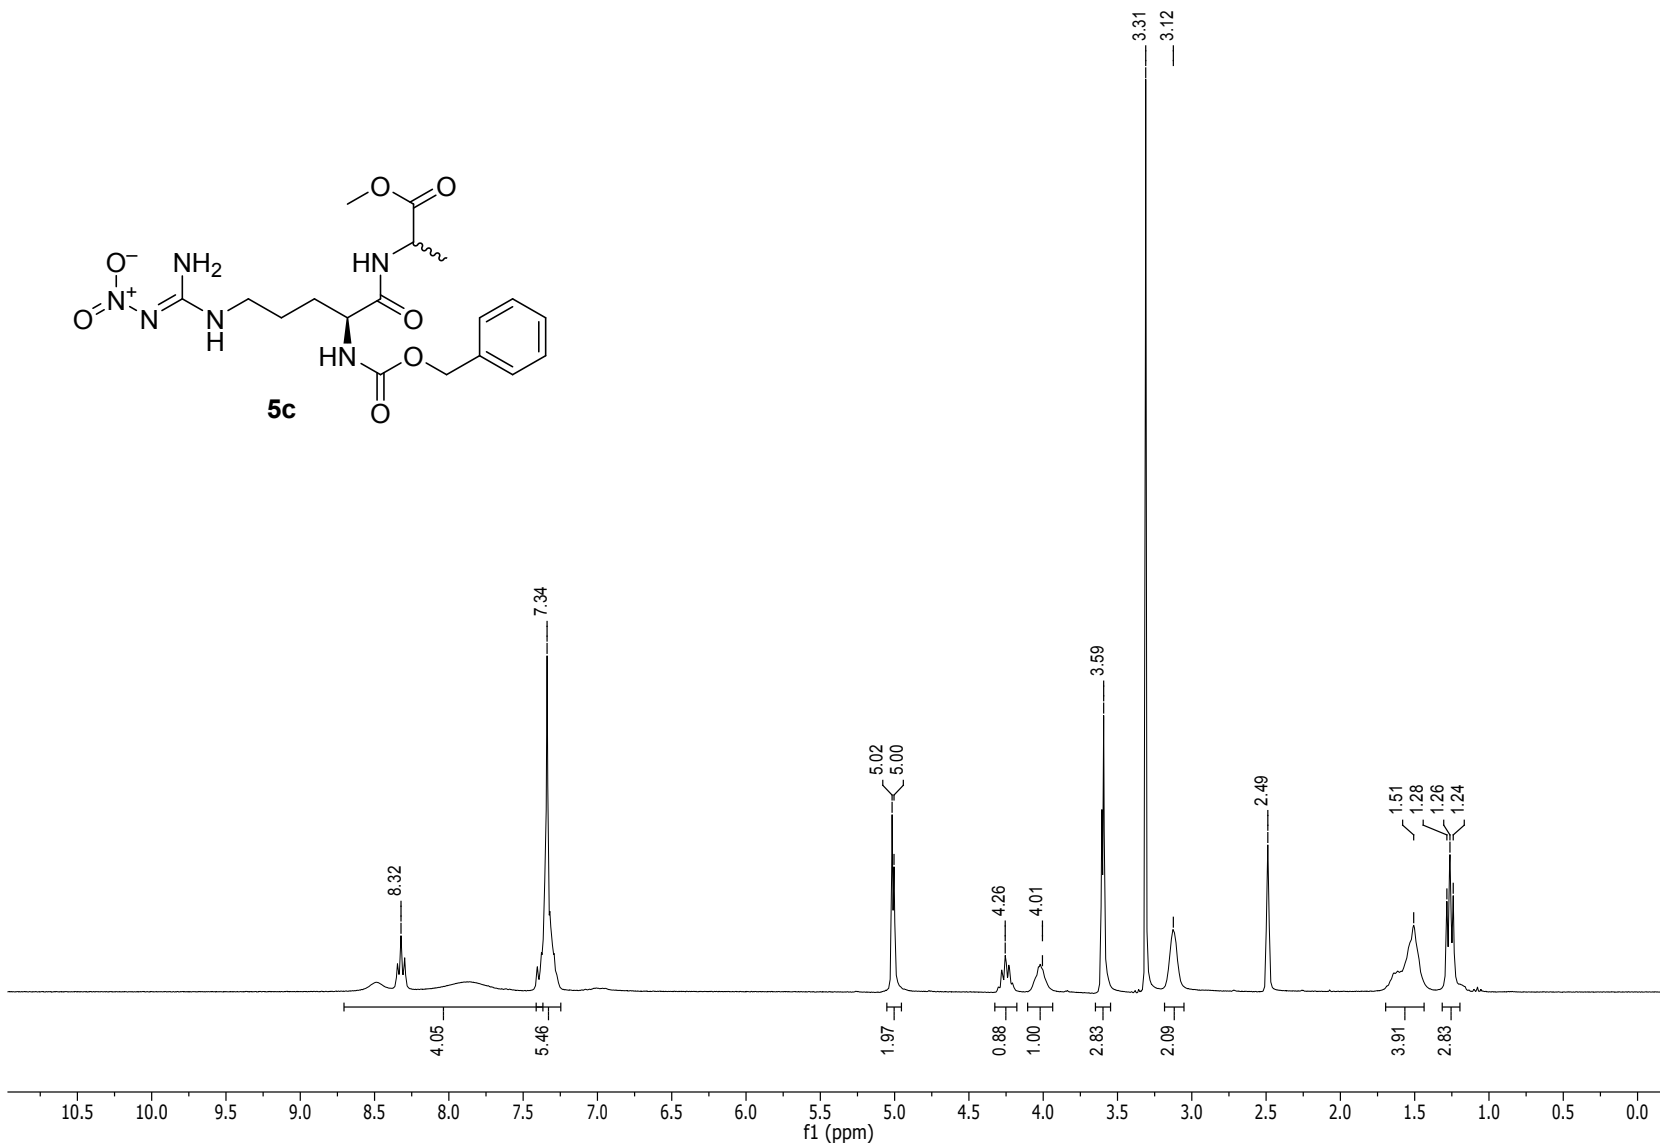

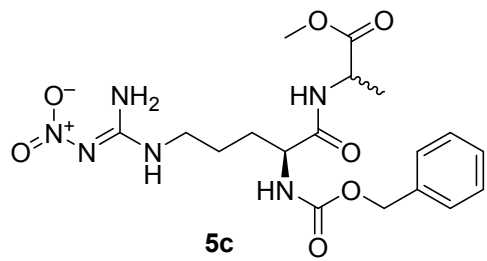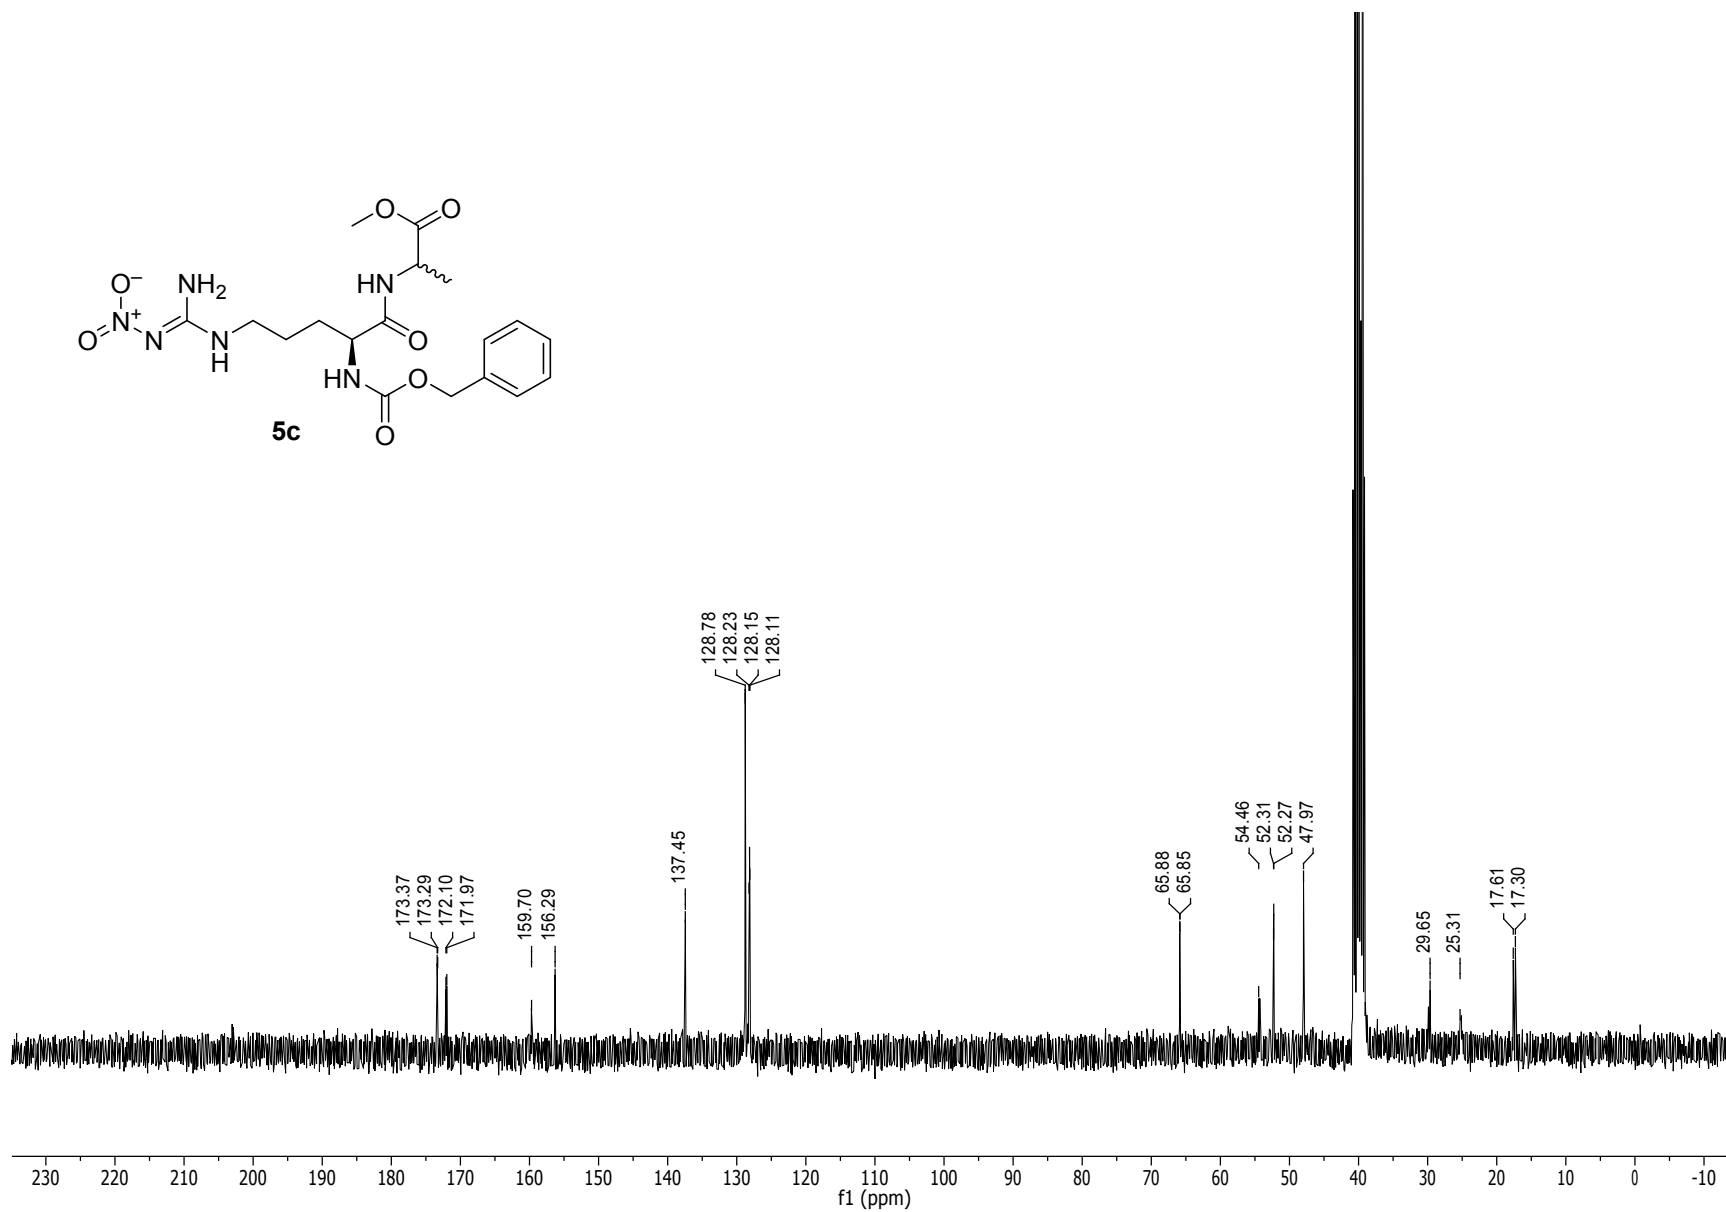

EAGER 200 Stripchart

Sample Ident. : 11 2146-DLAlaOMe    Filename : 286111  
 Analysed : 03-17-14 10:14:39    Printed : 03-17-2014 10:24:41

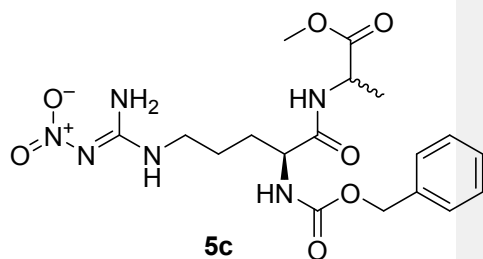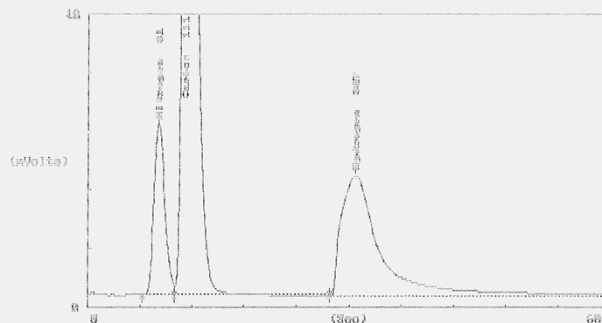

EAGER 200 Peak Integration Report

Instrument name : Instrument #1    Bline drift (fV): 2.6  
 Company Name : U of Florida    Operator Ident. : KOU  
 Analysed : 03-17-14 10:14:39    Printed : 03-17-2014 10:24:42  
 Sample Ident. : 11 2146-DLAlaOMe    Filename : 286111  
 Sample Weight : 2.116    Calc.method: using 'K. Factors'

| No. (#) | Type (#) | Start (Sec) | End (Sec) | Ret Time (Sec) | Height (fV) | Area (fV*Sec) | Area % (%) | Name     |
|---------|----------|-------------|-----------|----------------|-------------|---------------|------------|----------|
| 1       | FU       | 63          | 100       | 81             | 5766.0      | 78693         | 8.86       | Nitrogen |
| 2       | FU       | 100         | 278       | 111            | 40485.8     | 605406        | 68.15      | Carbon   |
| 3       | RS       | 278         | 597       | 307            | 4039.9      | 204228        | 22.99      | Hydrogen |
|         |          |             |           |                |             |               | 888332     | 100.00   |

EAGER 200 Unk Report

Instrument name : Instrument #1    Bline drift (fV): 2.6  
 Company Name : U of Florida    Operator Ident. : KOU  
 Analysed : 03-17-14 10:14:39    Printed : 03-17-2014 10:24:42  
 Sample Ident. : 11 2146-DLAlaOMe    Filename : 286111  
 Sample Weight : 2.116    Calc.method: using 'K. Factors'

| Pk. (#) | Ret Time (Sec) | Area (fV*Sec) | Element % (%) | Area Ratio  | Name     |
|---------|----------------|---------------|---------------|-------------|----------|
| 1       | 81             | 78693         | 19.448        | .769275E+01 | Nitrogen |
| 2       | 111            | 605406        | 49.270        | .100000E+01 | Carbon   |
| 3       | 307            | 204228        | 6.157         | .296436E+01 | Hydrogen |

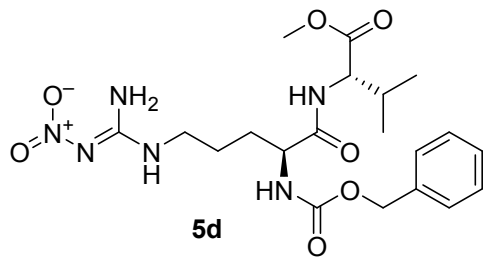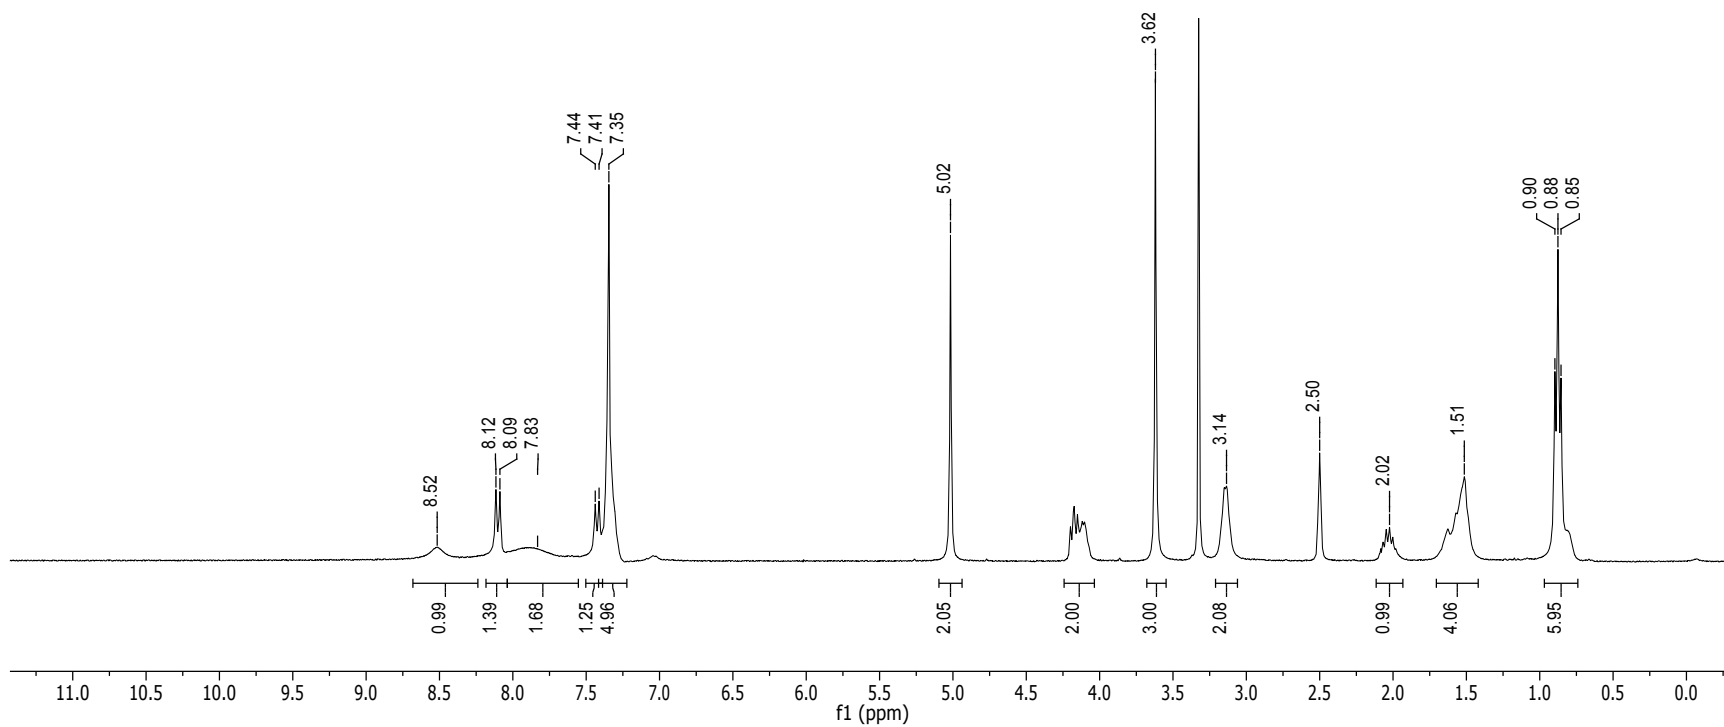

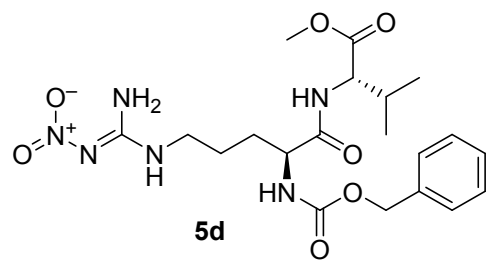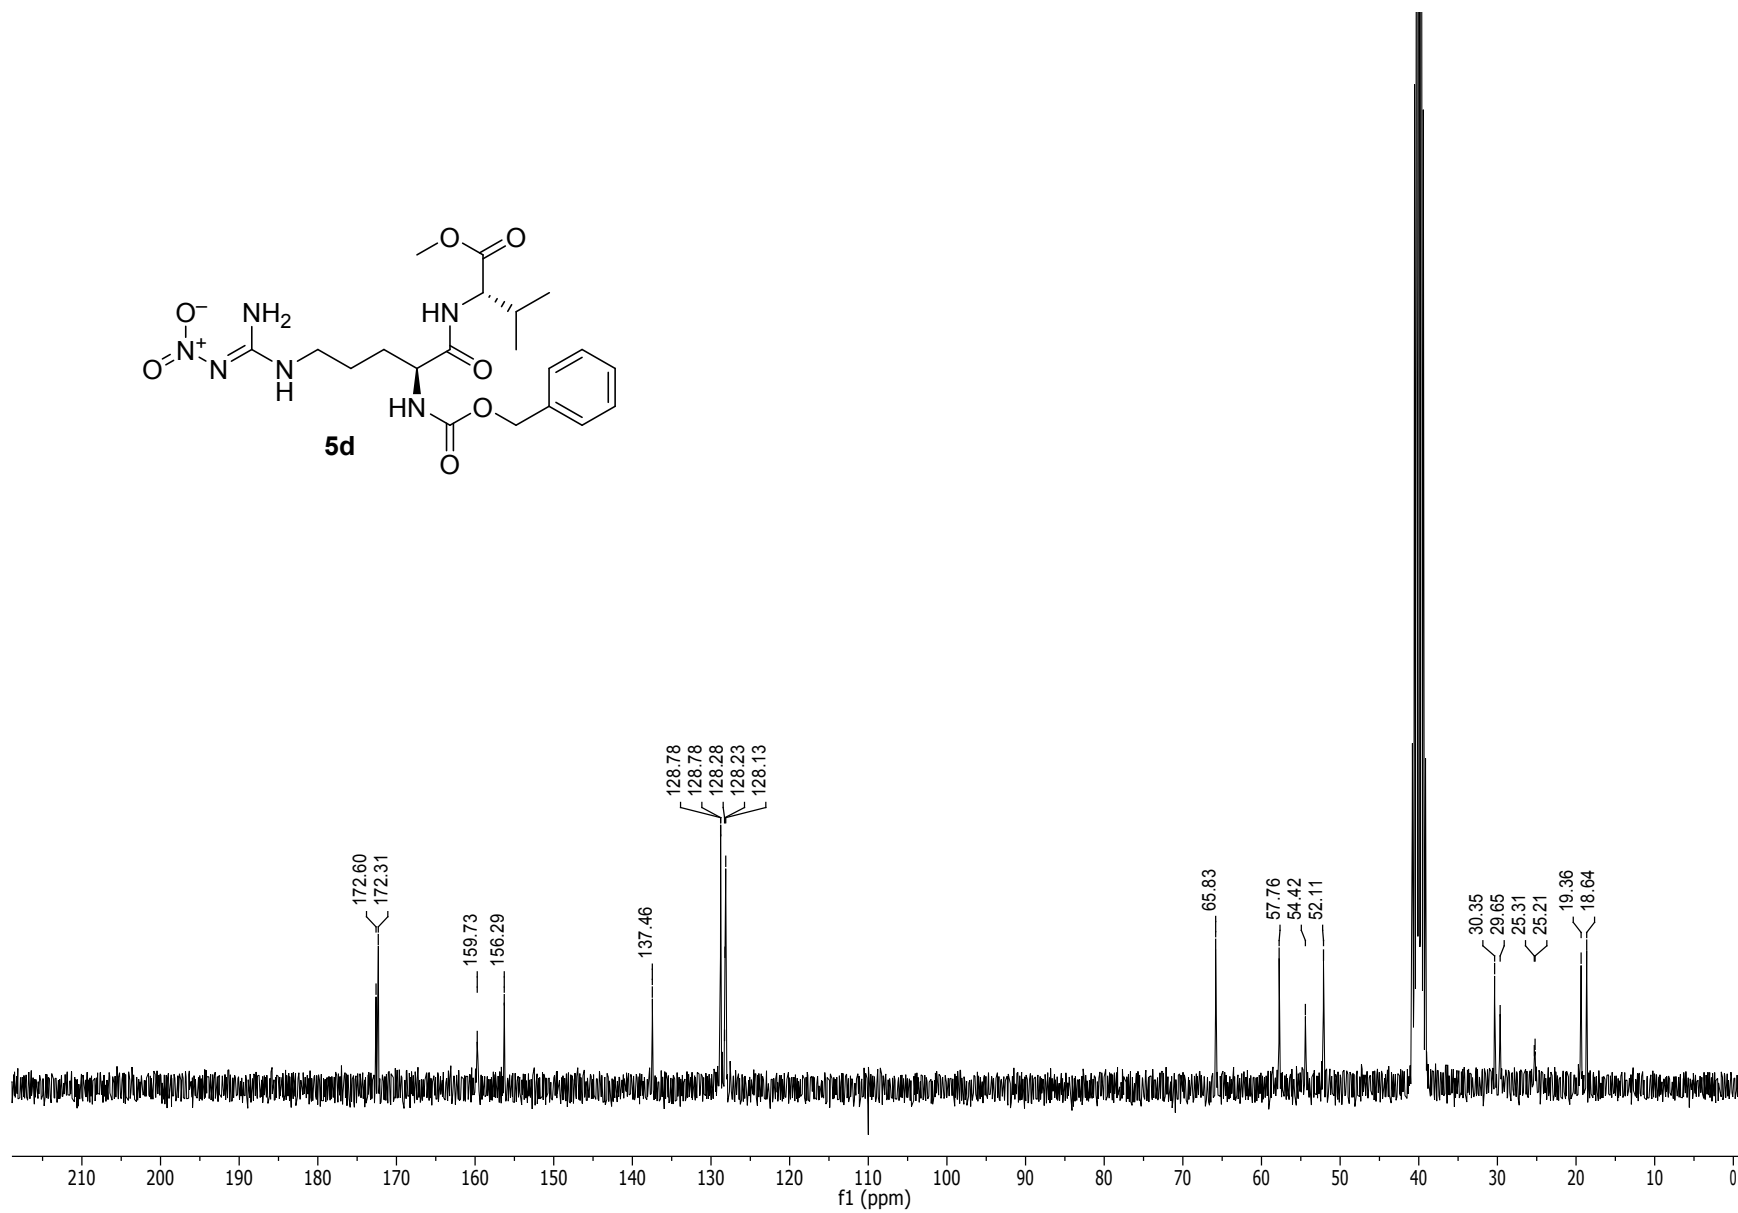

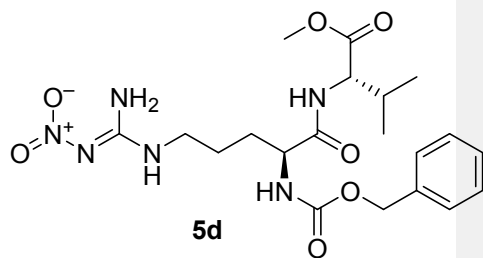

### EAGER 200 Stripchart

Sample Ident. : 18 2146\_ValOMe      Filename : 285318  
 Analysed : 02-18-14 13:00:44      Printed : 02-18-2014 14:43:44

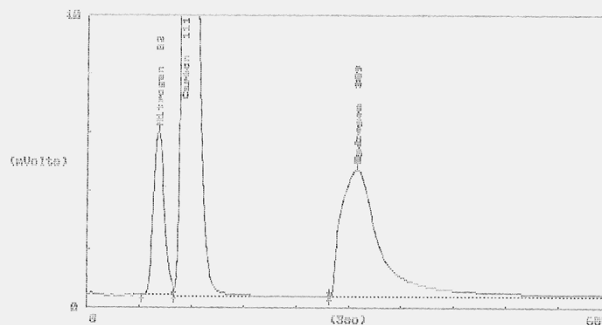

### EAGER 200 Peak Integration Report

Instrument name : Instrument #1      Bline drift (fV): 4.3  
 Company Name : U of Florida      Operator Ident. : KOU  
 Analysed : 02-18-14 13:00:44      Printed : 02-18-2014 14:43:45  
 Sample Ident. : 18 2146\_ValOMe      Filename : 285318  
 Sample Weight : 2.163      Calc.method: using 'K. Factors'

| No. (#) | Type (#) | Start (Sec) | End (Sec) | Ret Time (Sec) | Height (fV) | Area (fV*Sec) | Area % (%) | Name     |
|---------|----------|-------------|-----------|----------------|-------------|---------------|------------|----------|
| 1       | FU       | 63          | 100       | 82             | 5553.5      | 75611         | 8.09       | Nitrogen |
| 2       | FU       | 100         | 278       | 111            | 42407.0     | 632905        | 67.75      | Carbon   |
| 3       | RS       | 278         | 598       | 309            | 4287.5      | 225697        | 24.16      | Hydrogen |

934213 100.00

### EAGER 200 Unk Report

Instrument name : Instrument #1      Bline drift (fV): 4.3  
 Company Name : U of Florida      Operator Ident. : KOU  
 Analysed : 02-18-14 13:00:44      Printed : 02-18-2014 14:43:45  
 Sample Ident. : 18 2146\_ValOMe      Filename : 285318  
 Sample Weight : 2.163      Calc.method: using 'K. Factors'

| Pk. (#) | Ret Time (Sec) | Area (fV*Sec) | Element % (%) | Area Ratio  | Name     |
|---------|----------------|---------------|---------------|-------------|----------|
| 1       | 82             | 75611         | 18.089        | .837053E+01 | Nitrogen |
| 2       | 111            | 632905        | 51.161        | .100000E+01 | Carbon   |
| 3       | 309            | 225697        | 6.788         | .280423E+01 | Hydrogen |



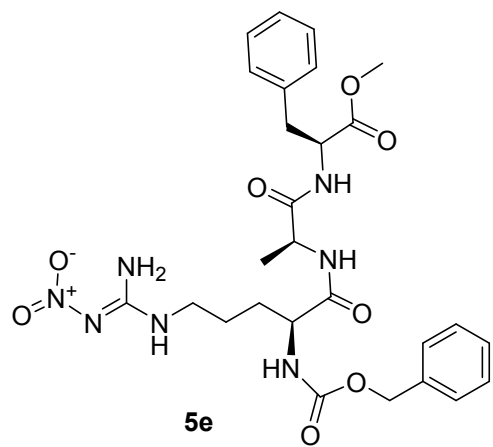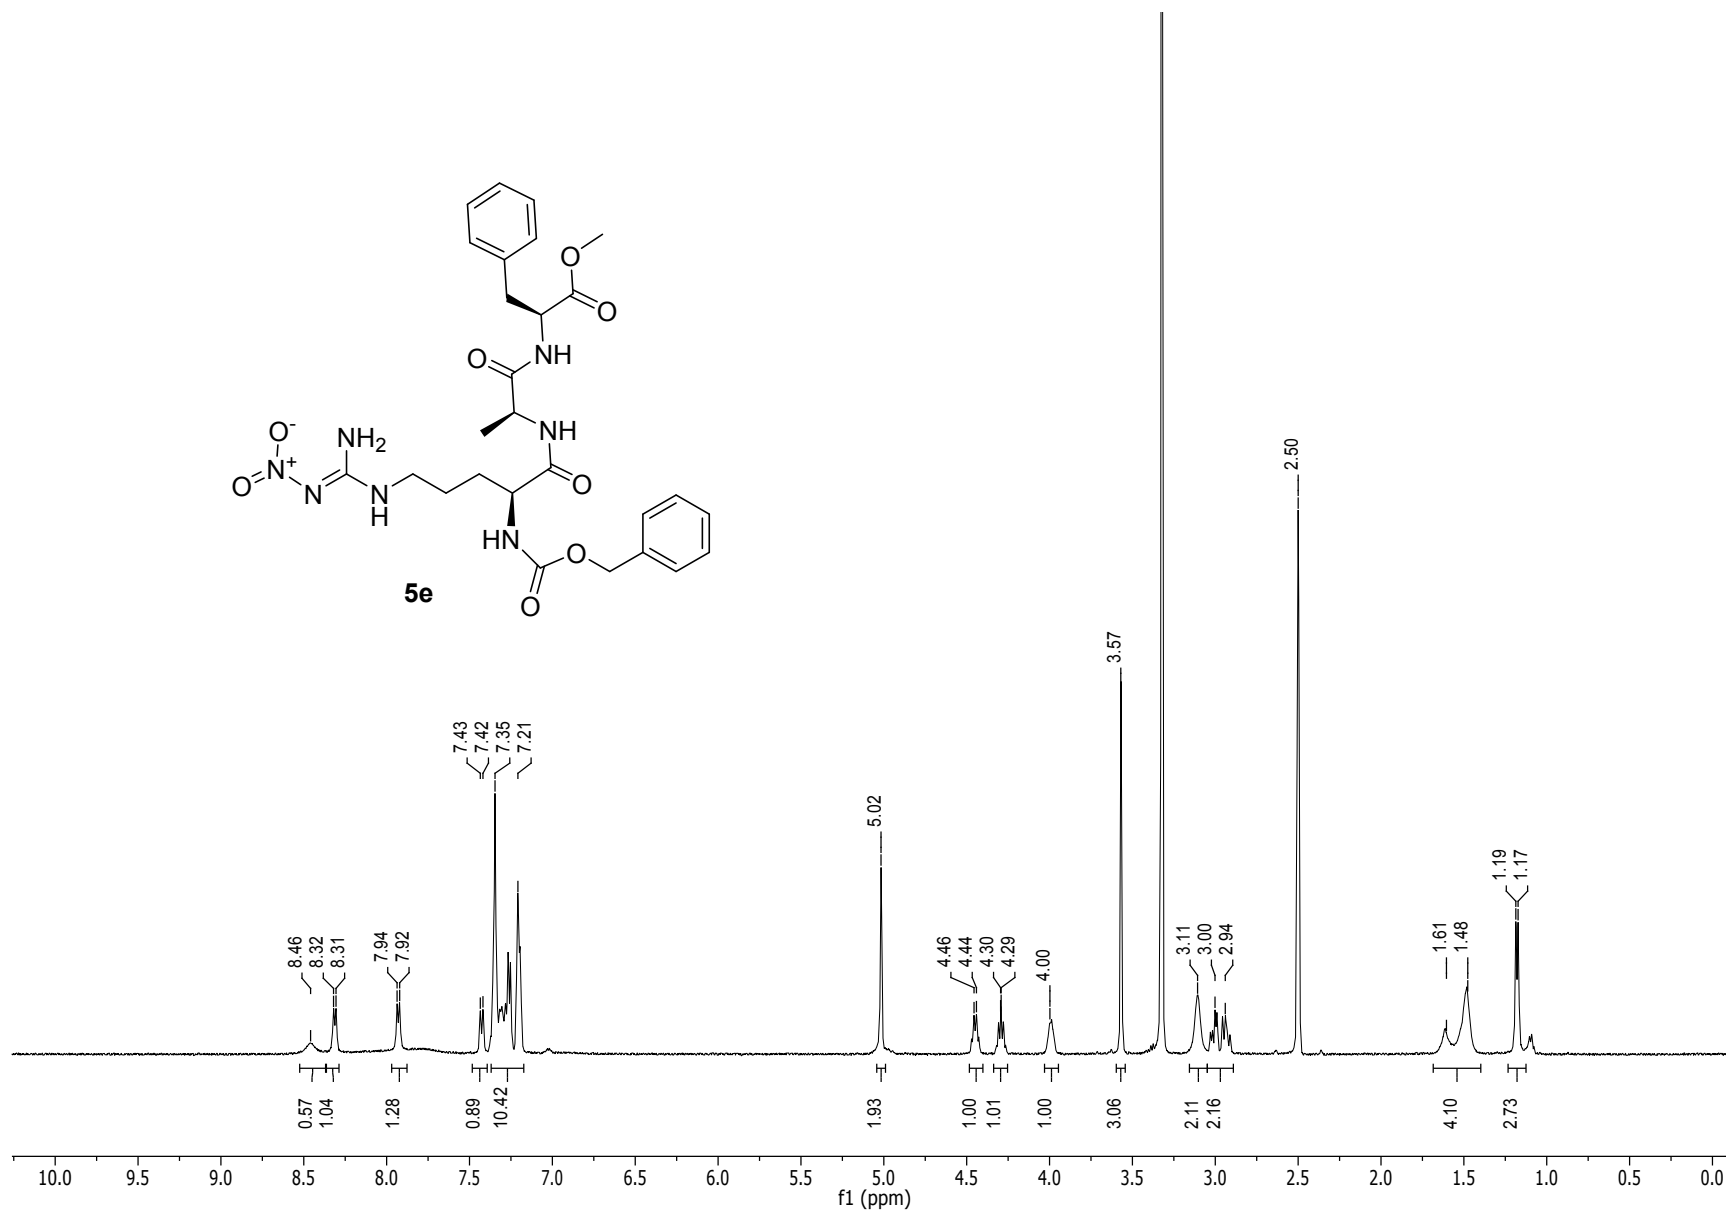

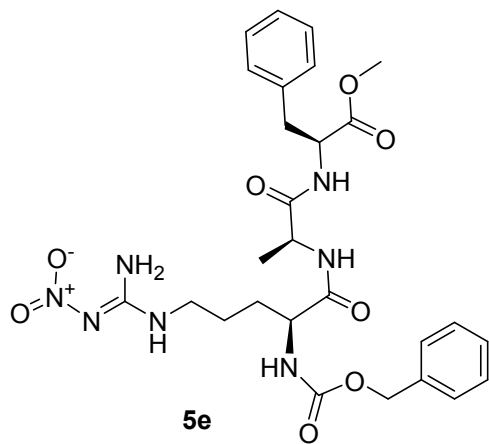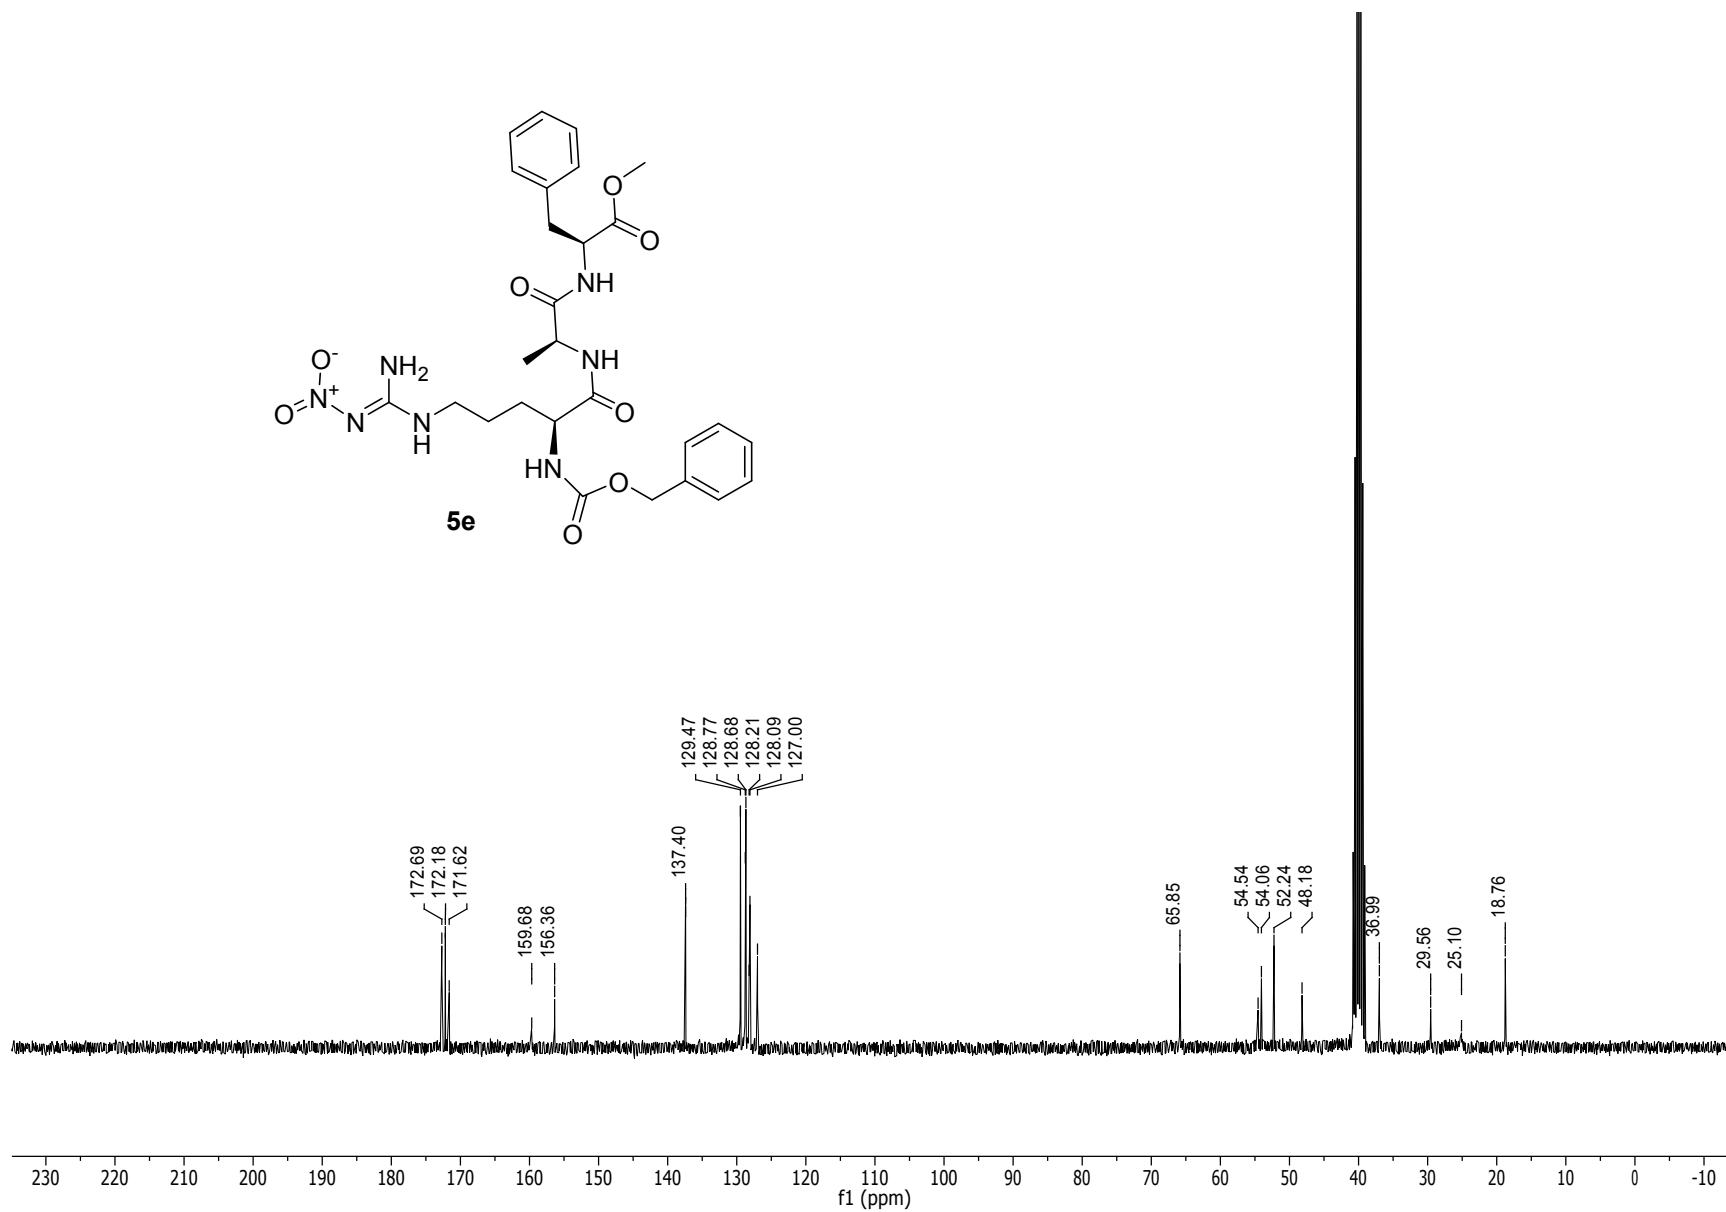

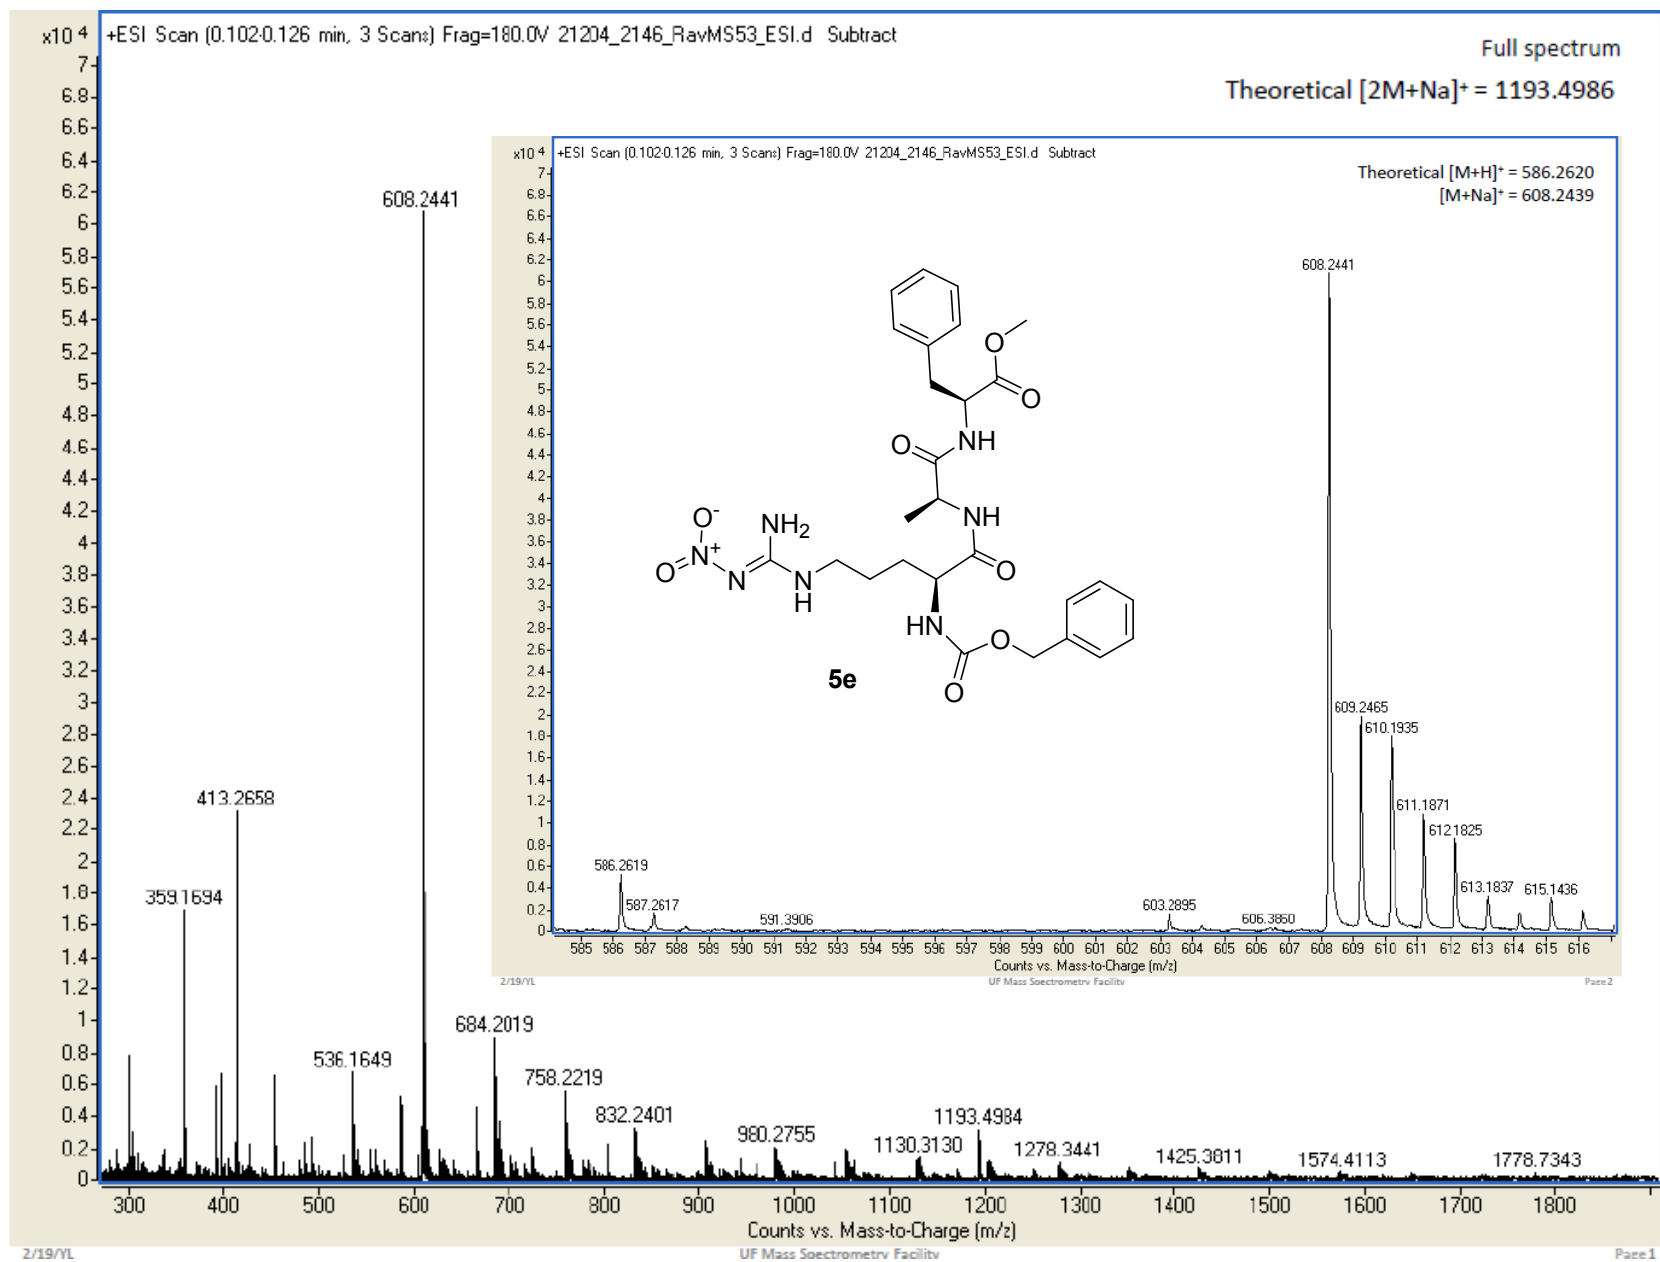

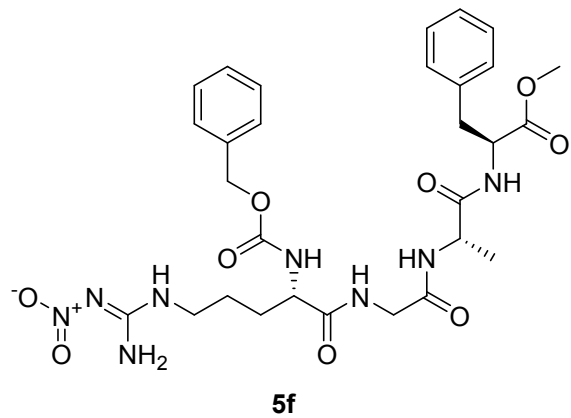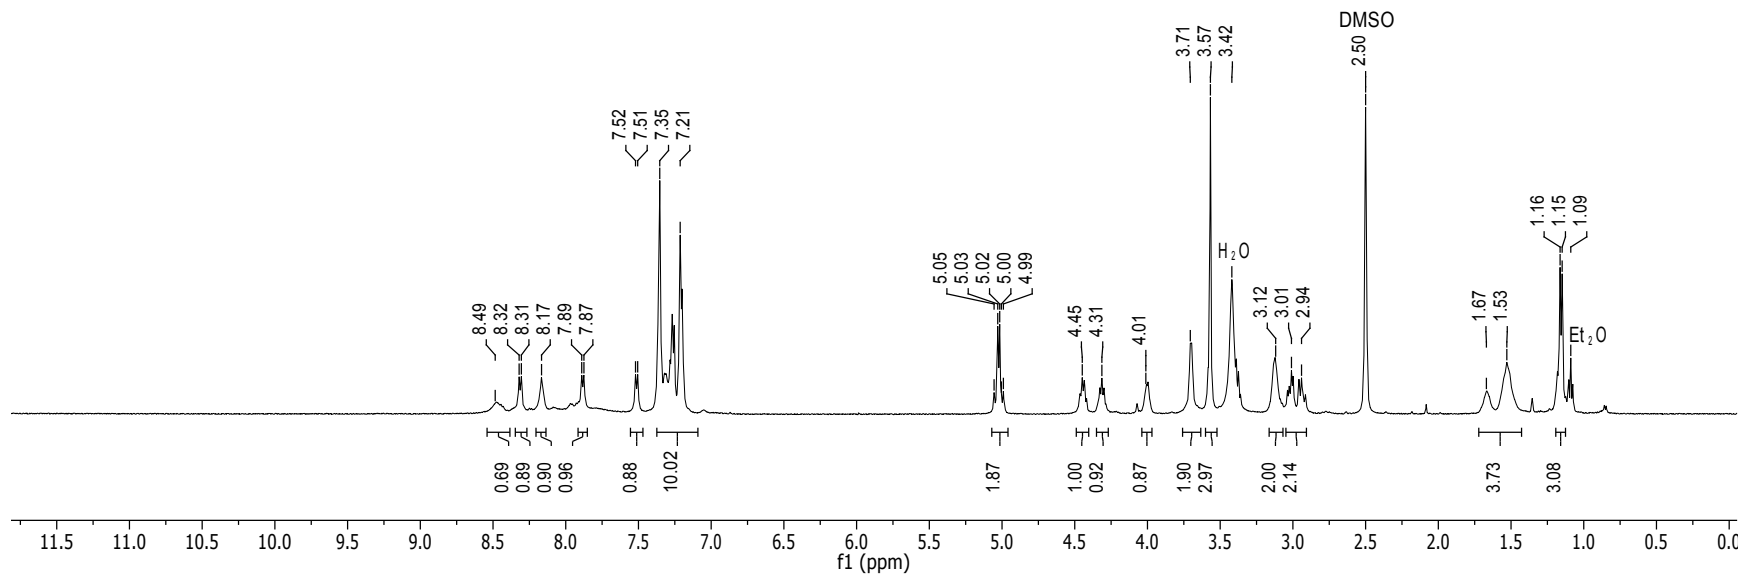





HPLC spectra of compound **5a**:

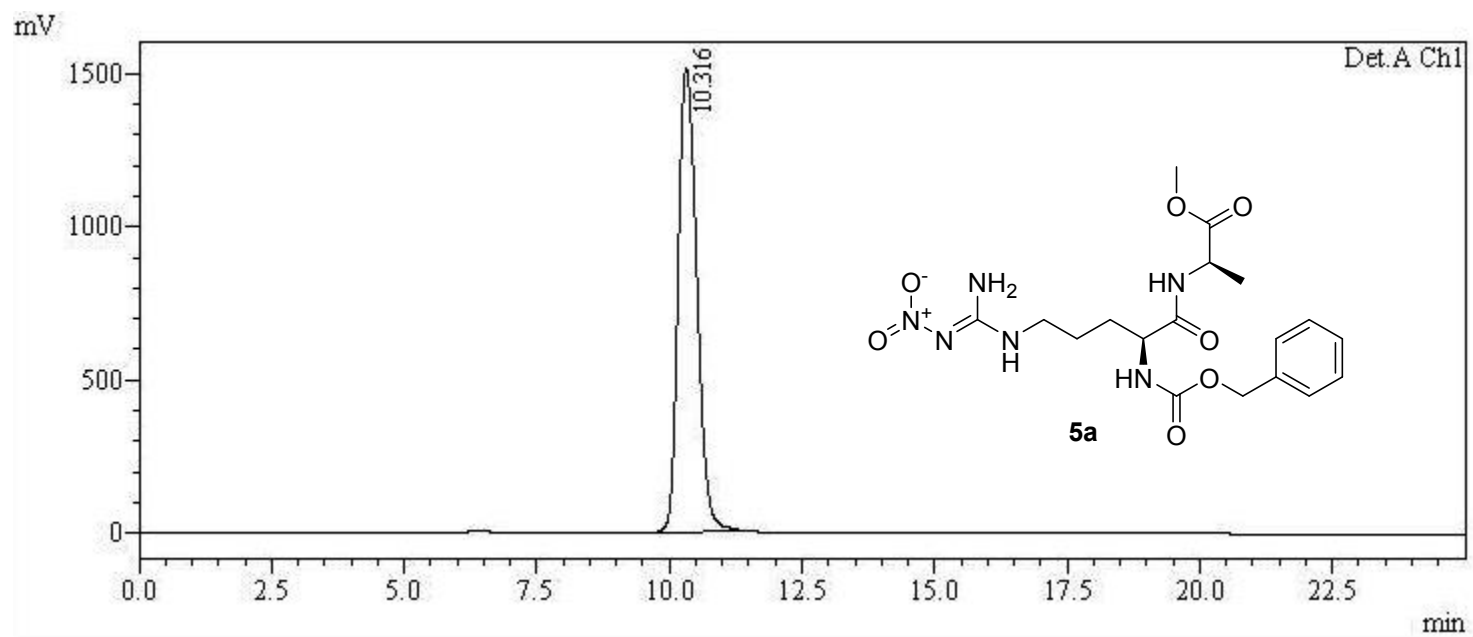

HPLC spectra of compound **5b**:

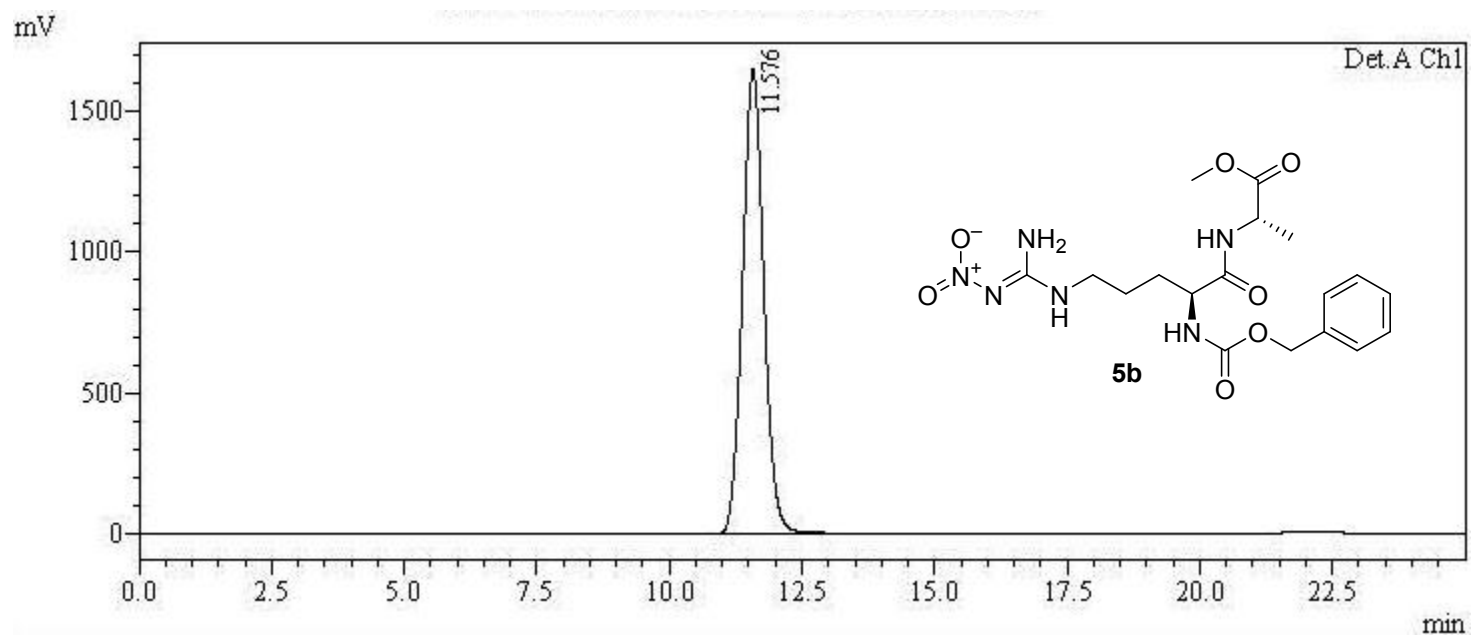



HPLC spectra of compound **5c**:

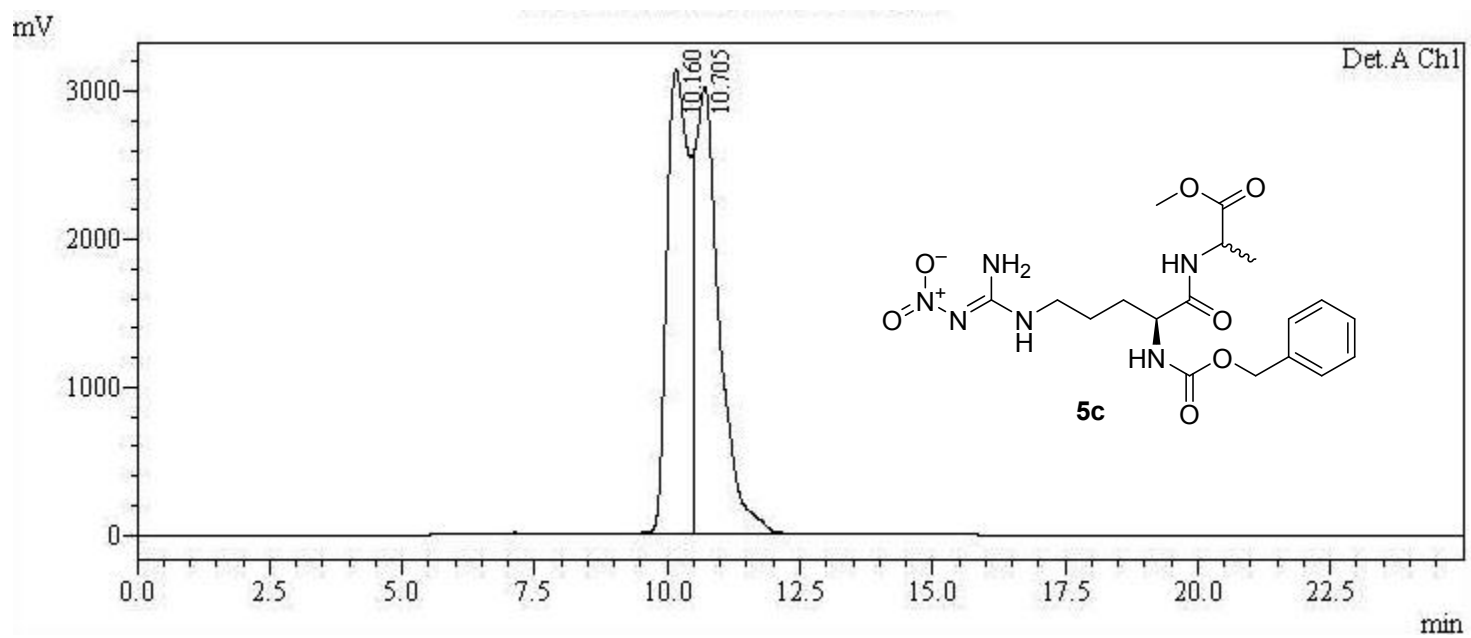

Supplement: c4ra04897k1.pdf [file c4ra04897k1.pdf]
